# Supplementary material for: Binuclear, tetranuclear and hexadecanuclear thio-oxomolybdenum(v/iv) glycolates with selective adsorptions of gases
Source: Royal Society of Chemistry journal article supplement (doi:10.1039/d2dt03324k), 2022-11-08
Supplement: d2dt03324k1.pdf [file d2dt03324k1.pdf]

Supporting materials

**Binuclear, tetranuclear and hexadecnuclear thio- oxomolybdenum(V/IV)  
glycolates with selective adsorptions of gases**

Rong-Yan Lin,<sup>‡</sup> Lan Deng,<sup>‡</sup> Dong-Li An, Zhao-Hui Zhou\*

*State Key Laboratory of Physical Chemistry of Solid Surfaces and Department of Chemistry, College of Chemistry and Chemical Engineering, Xiamen University, Xiamen, 361005, China, Tel: + 86-592-2184531; Fax: + 86-592-2183047  
zhzhou@xmu.edu.cn*

<sup>‡</sup> These authors contributed equally to this work.

**Figure and Table Options**

**Figure S1.** Polyhedral representation of **1**.

**Figure S2.** Forming a circular cavity of 3.8 Å approximately in **2** and its corresponding simplified topological nets, green sphere represents a complete tetramer.

**Figure S3.** View of the main structure of **3**. Symmetric code: a (-x, -y, -z).

**Figure S4.** (a) Polyhedral representation of **4**. (b) The skeleton connection in **4-part 2**. (c) Highlighted pz/Hpz ligands in **4-part 2**. (d) Highlighted intramolecular hydrogen bonds in **4**.

**Figure S5.** 3D holes exist in **1** viewed along (1, 1, 0) direction with a diameter of 3.0 Å approximately. Atomic color: molybdenum, violet; oxygen, red; nitrogen, blue; carbon, gray; hydrogen, white.

**Figure S6.** Packing diagram of **1** in *c*-axis direction, forming an "8"-shaped cavity of 6.4 × 2.8 Å<sup>2</sup> approximately.

**Figure S7.** Packing diagram of **2** viewed from *a*-axis direction.

**Figure S8.** Packing diagram of **2** viewed from *b*-axis direction.

**Figure S9.** Packing diagram of **3** viewed from (0, 1, 1) direction.

**Figure S10.** Packing diagram of **3** viewed from (1, 1, 0) direction.

**Figure S11.** Packing diagram of **4** viewed from *b*-axis direction.

**Figure S12.** Solution EPR spectra of **1** ~ **3** in DMSO solvents at 110 K respectively.

**Figure S13.** O<sub>2</sub>, CO<sub>2</sub>, N<sub>2</sub>, CH<sub>4</sub> and H<sub>2</sub> adsorptions for **1** at different pressures at 298 K, respectively.

**Figure S14.** N<sub>2</sub> adsorption-desorption isotherms of Na<sub>2</sub>[Mo<sub>16</sub>O<sub>12</sub>(μ<sub>2</sub>-O)<sub>6</sub>(μ<sub>2</sub>-OH)<sub>2</sub>(μ<sub>3</sub>-O)<sub>12</sub>(glyc)<sub>4</sub>(Hpz)<sub>4</sub>(pz)<sub>8</sub>]·28H<sub>2</sub>O (**4**) at low pressure.

**Figure S15.** (a) CO<sub>2</sub> adsorption isotherms for **4** at different temperatures (298 and 308 K) under the low pressure; (b) Isosteric heat of adsorption (Q<sub>st</sub>) plotted against CO<sub>2</sub> uptake for **4**.

**Figure S16.** O<sub>2</sub> and CO<sub>2</sub> adsorption isotherms for **4** at 298 K and pressures of up to 1 bar.

**Figure S17.** Calculated and simulated PXRD patterns of compound **1**.

**Figure S18.** Calculated and simulated PXRD patterns of compound **2**.

**Figure S19.** Calculated and simulated PXRD patterns of compound **3**.

**Figure S20.** Calculated and simulated PXRD patterns of compound **4**.

**Figure S21.** TG-DTG curves of compound **1**.

**Figure S22.** TG-DTG curves of compound **2**.

**Figure S23.** TG-DTG curves of compound **3**.

**Figure S24.** TG-DTG curves of compound **4**.

**Figure S25.** IR spectrum of compound **1**.

**Figure S26.** IR spectrum of compound **2**.

**Figure S27.** IR spectrum of compound **3**.

**Figure S28.** IR spectrum of compound **4**.

**Figure S29.** IR spectrum of pyrazole ligands.

**Figure S30.** Solid-state UV-vis reflective spectra for **1** ~ **4**.

**Figure S31.** Solid-state  $^{13}\text{C}$  NMR spectrum for **3**.

**Figure S32.** Positive ion electrospray ionization mass spectra (ESI-MS) of **1** in MeOH solution.

**Table S1.** Crystallographic data and structural refinements for complexes  $[\text{Mo}_2\text{O}_2(\mu_2\text{-O})(\mu_2\text{-S})(\text{Hglyc})_2(\text{Hpz})_2]\cdot\text{H}_2\text{O}$  (**1**),  $(\text{Hdpa})[\text{Mo}_2\text{O}_2(\mu_2\text{-S})_2(\text{Hglyc})(\text{glyc})(\text{H}_2\text{O})]$  (**2**),  $(\text{Hdpa})_4[\text{Mo}_4\text{O}_4(\mu_3\text{-O})_2(\mu_2\text{-S})_2(\text{glyc})_2(\text{S}_2\text{O}_3)_2]$  (**3**) and  $\text{Na}_2[\text{Mo}_{16}\text{O}_{12}(\mu_2\text{-O})_6(\mu_2\text{-OH})_2(\mu_3\text{-O})_{12}(\text{glyc})_4(\text{Hpz})_4(\text{pz})_8]\cdot 28\text{H}_2\text{O}$  (**4**) respectively.

**Table S2.** Selected hydrogen bond distances (Å) and angles (°) in  $[\text{Mo}_2\text{O}_2(\mu_2\text{-O})(\mu_2\text{-S})(\text{Hglyc})_2(\text{Hpz})_2]\cdot\text{H}_2\text{O}$  (**1**).

**Table S3.** Selected hydrogen bond distances (Å) and angles (°) in  $(\text{Hdpa})[\text{Mo}_2\text{O}_2(\mu_2\text{-S})_2(\text{Hglyc})(\text{glyc})(\text{H}_2\text{O})]$  (**2**).

**Table S4.** Selected hydrogen bond distances (Å) and angles (°) in  $(\text{Hdpa})_4[\text{Mo}_4\text{O}_4(\mu_3\text{-O})_2(\mu_2\text{-S})_2(\text{glyc})_2(\text{S}_2\text{O}_3)_2]$  (**3**).

**Table S5.** Selected hydrogen bond distances (Å) and angles (°) in  $\text{Na}_2[\text{Mo}_{16}\text{O}_{12}(\mu_2\text{-O})_6(\mu_2\text{-OH})_2(\mu_3\text{-O})_{12}(\text{glyc})_4(\text{Hpz})_4(\text{pz})_8]\cdot 28\text{H}_2\text{O}$  (**4**).

**Table S6.** Bond valence calculations for complexes **1** ~ **4** respectively.

**Table S7.** Selected bond distances (Å) and angles (°) in  $[\text{Mo}_2\text{O}_2(\mu_2\text{-O})(\mu_2\text{-S})(\text{Hglyc})_2(\text{Hpz})_2]\cdot\text{H}_2\text{O}$  (**1**).

**Table S8.** Selected bond distances (Å) and angles (°) in  $(\text{Hdpa})[\text{Mo}_2\text{O}_2(\mu_2\text{-S})_2(\text{Hglyc})(\text{glyc})(\text{H}_2\text{O})]$  (**2**).

**Table S9.** Selected bond distances (Å) and angles (°) in  $(\text{Hdpa})_4[\text{Mo}_4\text{O}_4(\mu_3\text{-O})_2(\mu_2\text{-S})_2(\text{glyc})_2(\text{S}_2\text{O}_3)_2]$  (**3**).

**Table S10.** Selected bond distances (Å) and angles (°) in  $\text{Na}_2[\text{Mo}_{16}\text{O}_{12}(\mu_2\text{-O})_6(\mu_2\text{-OH})_2(\mu_3\text{-O})_{12}(\text{glyc})_4(\text{Hpz})_4(\text{pz})_8]\cdot 28\text{H}_2\text{O}$  (**4**).

**Table S11.** Detail calibrated adsorption data of  $\text{O}_2$ ,  $\text{N}_2$  and  $\text{CO}_2$  for  $\text{Na}_2[\text{Mo}_{16}\text{O}_{12}(\mu_2\text{-O})_6(\mu_2\text{-OH})_2(\mu_3\text{-O})_{12}(\text{glyc})_4(\text{Hpz})_4(\text{pz})_8]\cdot 28\text{H}_2\text{O}$  (**4**) at 298 K.

**Table S12.** Comparisons of  $\text{O}_2$  adsorption data for **4** with some other adsorbents at different conditions.

**Table S13.** Comparisons of  $\text{CO}_2$  adsorption data for **4** with the other typical MOFs at 298 K.

**Table S14.** Solid  $^{13}\text{C}$  NMR spectral data (ppm) of **1** ~ **4**.

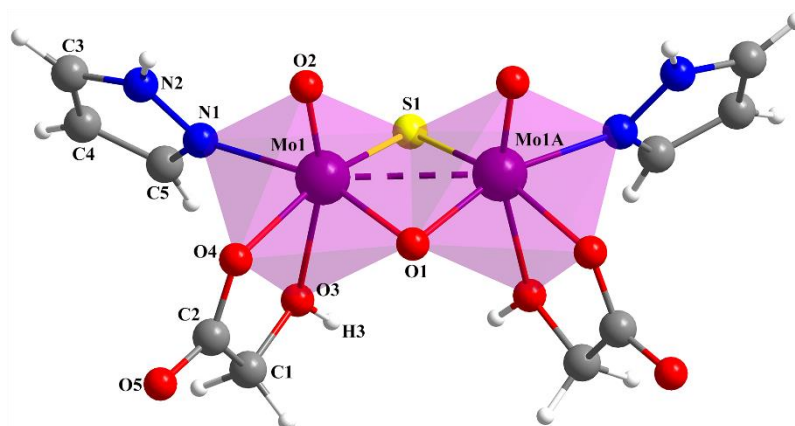

**Figure S1.** Polyhedral representation of **1**.

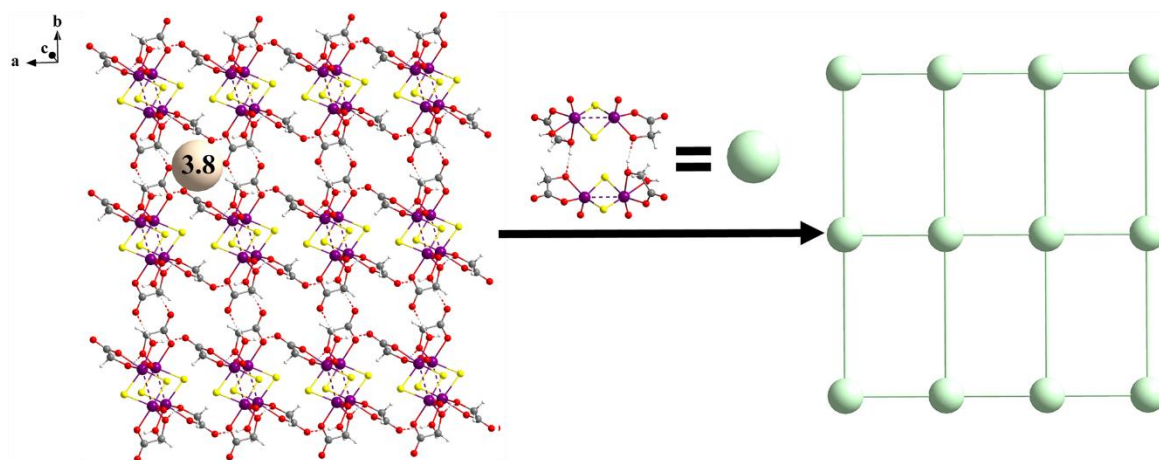

**Figure S2.** Forming a circular cavity of 3.8 Å approximately in **2** and its corresponding simplified topological nets, green sphere represents a complete tetramer.

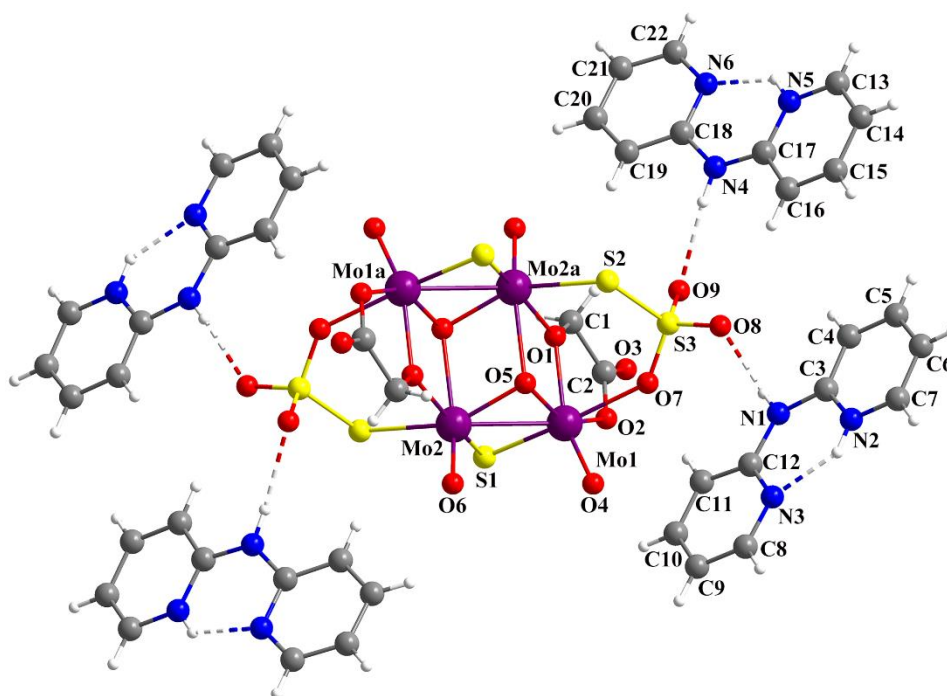

**Figure S3.** View of the main structure of **3**. Symmetric code:  $a$   $(-x, -y, -z)$ .

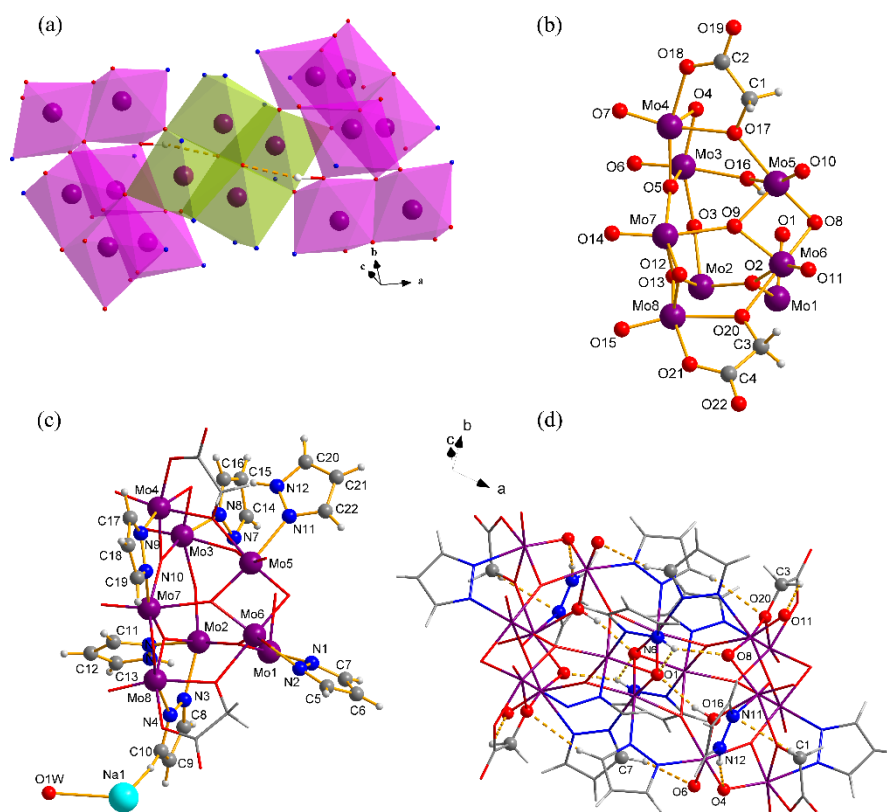

**Figure S4.** (a) Polyhedral representation of **4**. (b) The skeleton connection in **4-part 2**. (c) Highlighted pz/Hzp ligands in **4-part 2**. (d) Highlighted intramolecular hydrogen bonds in **4**.

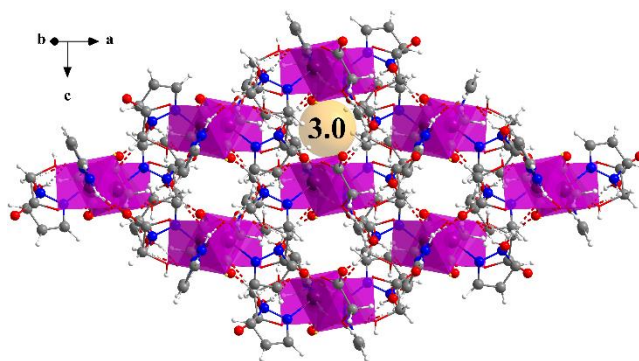

**Figure S5.** 3D holes exist in **1** viewed along (1,1,0) direction with a diameter of 3.0 Å approximately. Atomic color: molybdenum, violet; oxygen, red; nitrogen, blue; carbon, gray; hydrogen, white.

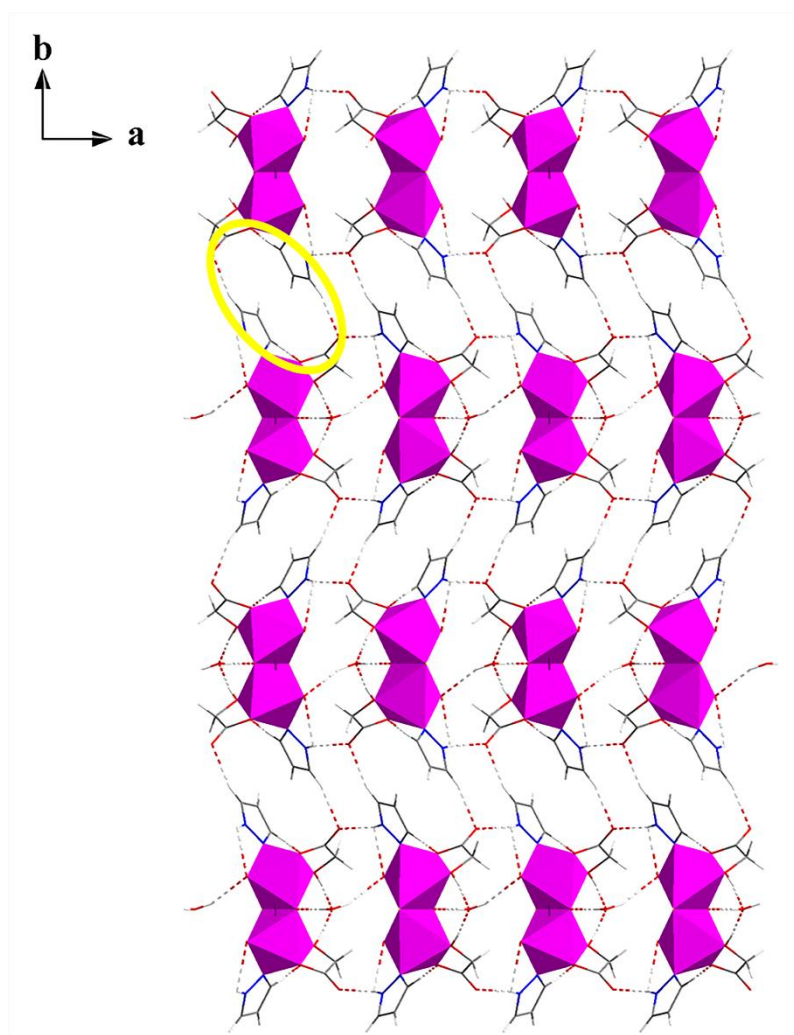

**Figure S6.** Packing diagram of **1** in *c*-axis direction, forming an "8"-shaped cavity of  $6.4 \times 2.8 \text{ \AA}^2$  approximately.

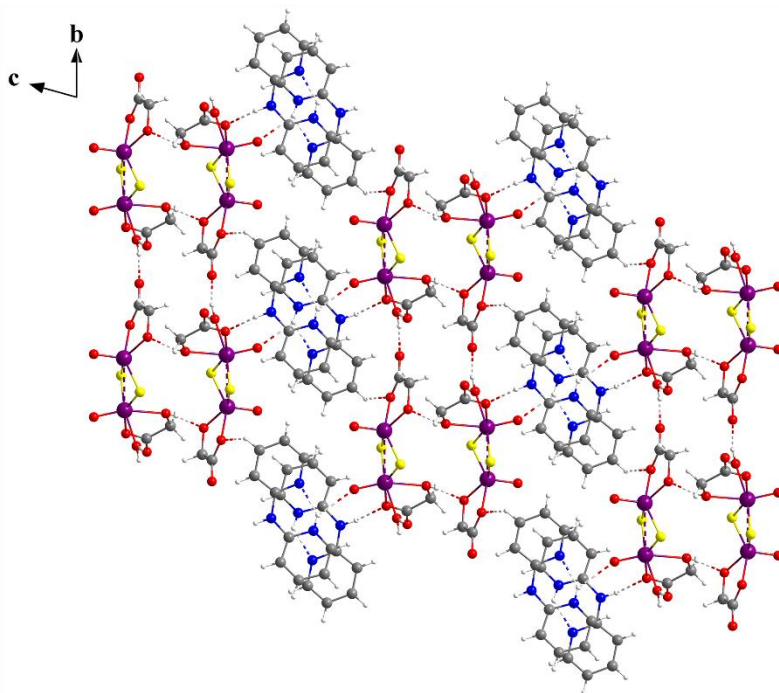

**Figure S7.** Packing diagram of **2** viewed from *a*-axis direction.

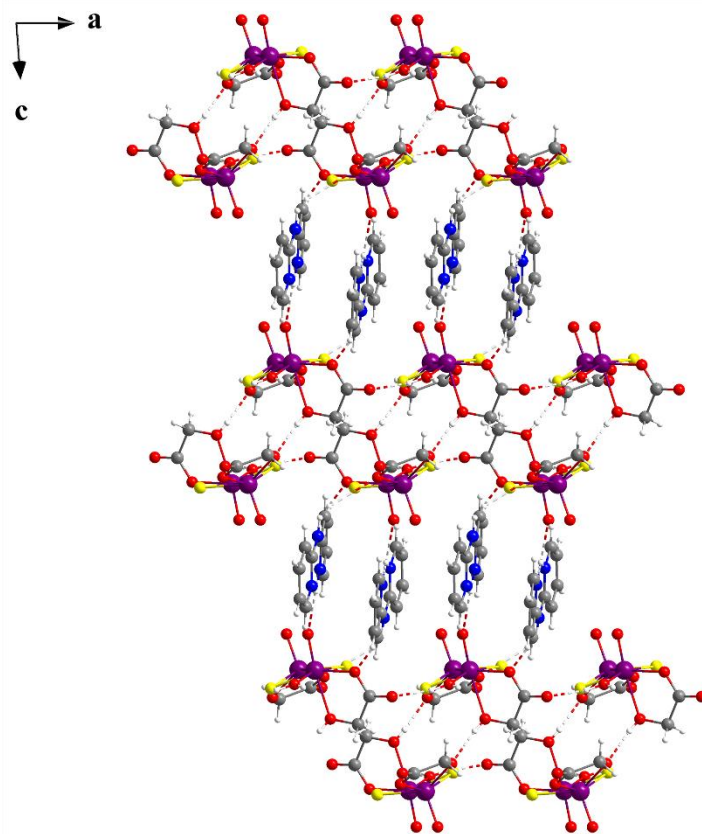

**Figure S8.** Packing diagram of **2** viewed from *b*-axis direction.



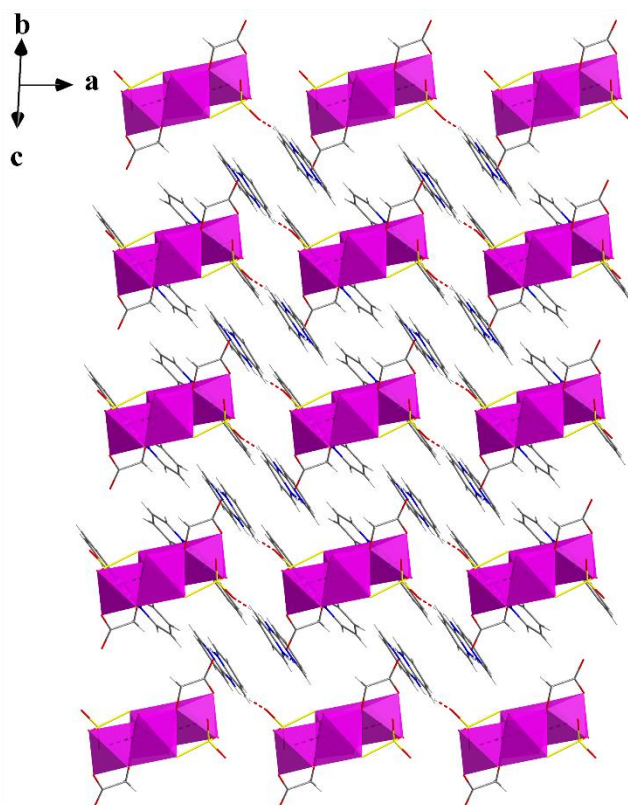

**Figure S9.** Packing diagram of **3** viewed from (0, 1, 1) direction.

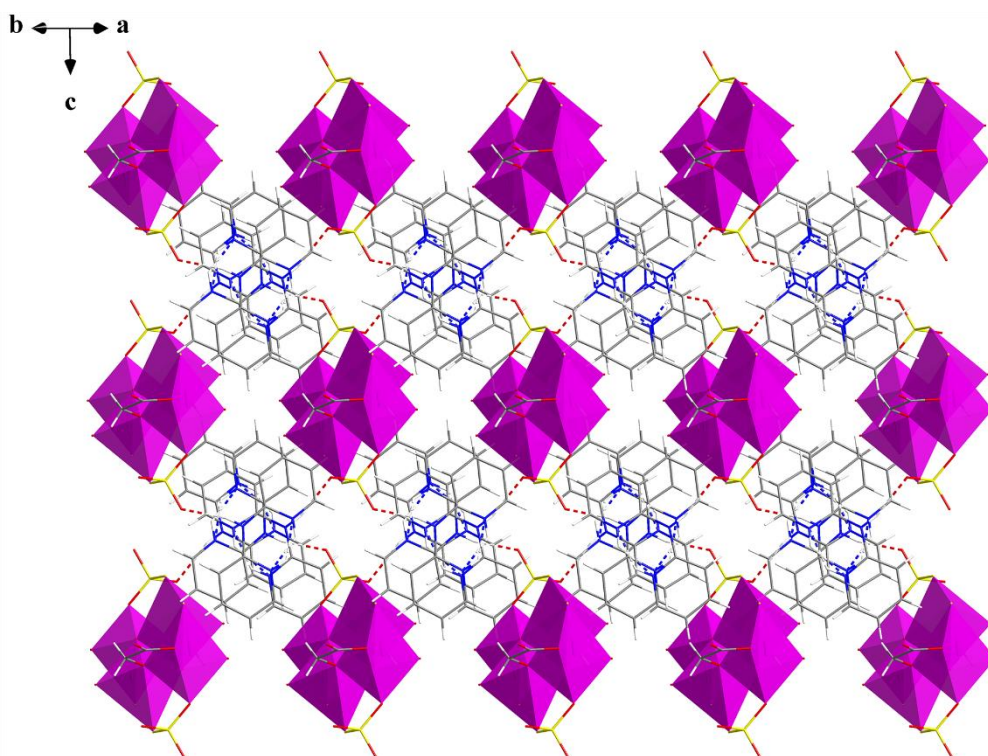

**Figure S10.** Packing diagram of **3** viewed from (1, 1, 0) direction.

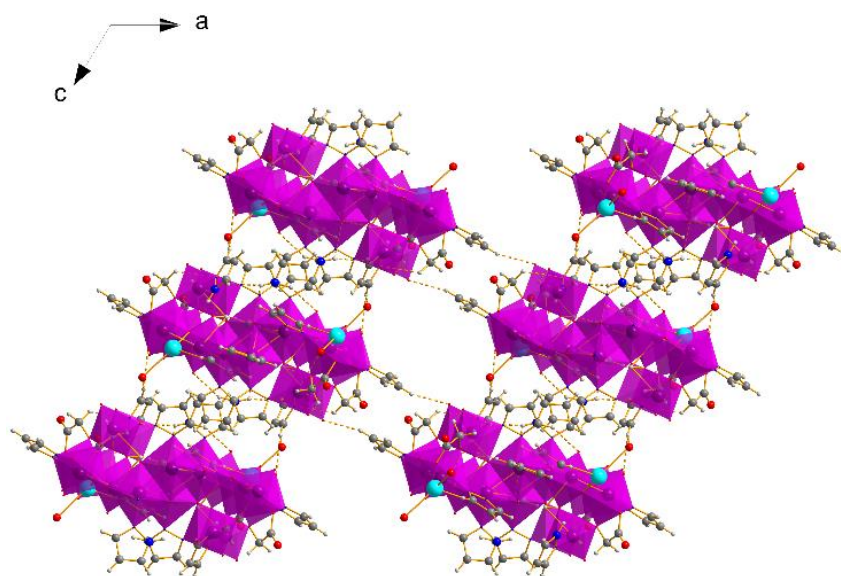

**Figure S11.** Packing diagram of **4** viewed from *b*-axis direction.

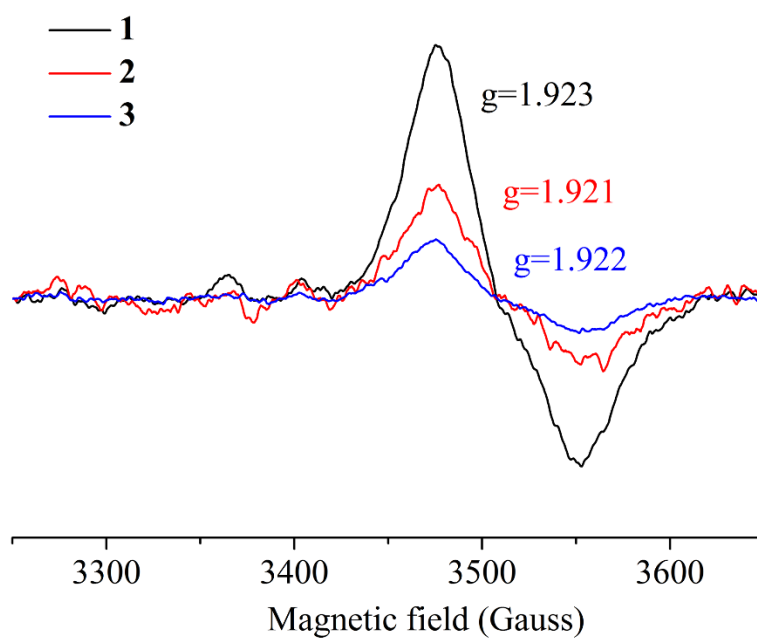

**Figure S12.** Solution EPR spectra of **1** ~ **3** in DMSO solvents at 110 K respectively.



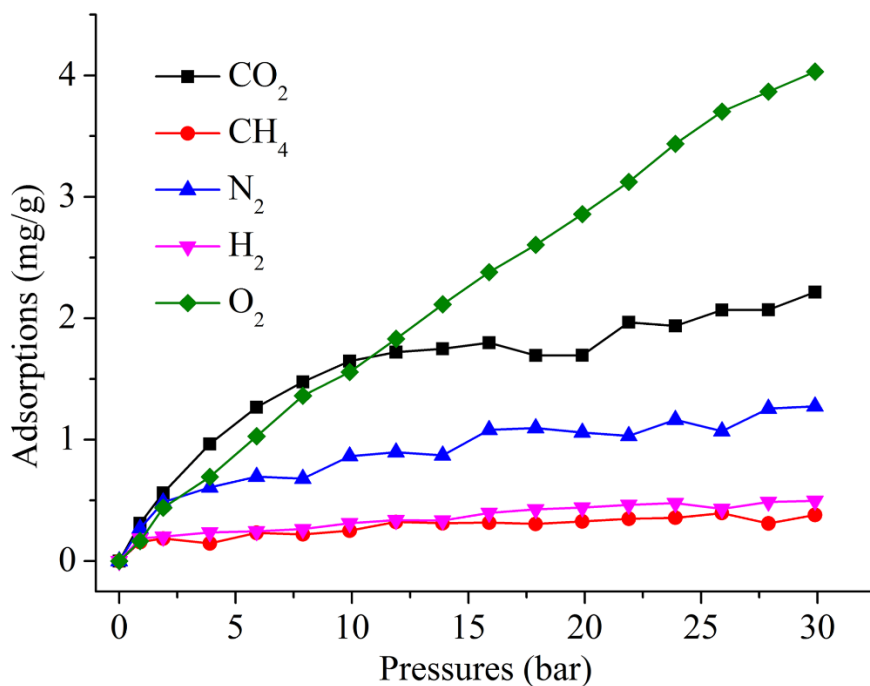

**Figure S13.** O<sub>2</sub>, CO<sub>2</sub>, N<sub>2</sub>, CH<sub>4</sub> and H<sub>2</sub> adsorptions for **1** at different pressures at 298 K, respectively.

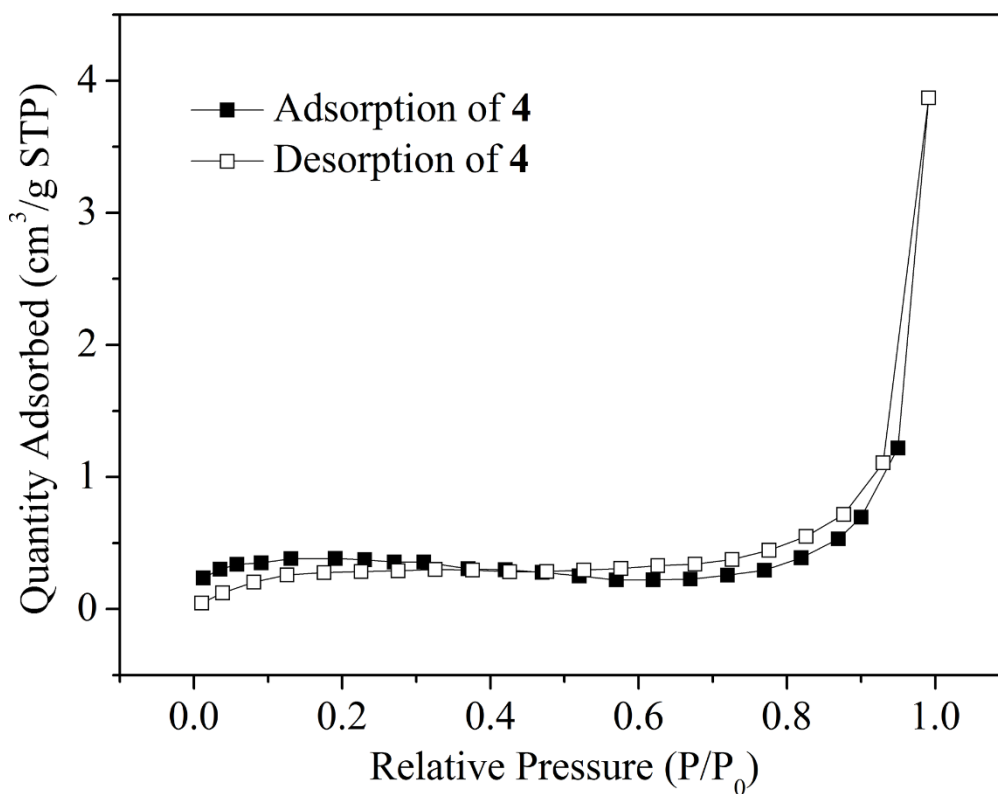

**Figure S14.** N<sub>2</sub> adsorption-desorption isotherms of Na<sub>2</sub>[Mo<sub>16</sub>O<sub>12</sub>(μ<sub>2</sub>-O)<sub>6</sub>(μ<sub>2</sub>-OH)<sub>2</sub>(μ<sub>3</sub>-O)<sub>12</sub>(glyc)<sub>4</sub>(Hpz)<sub>4</sub>(pz)<sub>8</sub>]·28H<sub>2</sub>O (**4**) at low pressure.

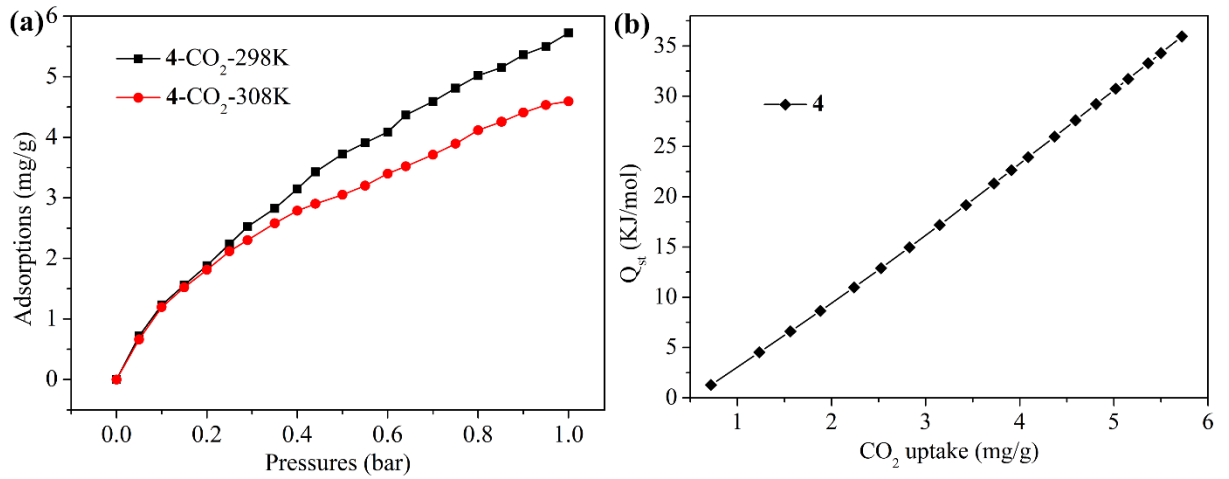

**Figure S15.** (a) CO<sub>2</sub> adsorption isotherms for **4** at different temperatures (298 and 308 K) under the low pressure; (b) Isosteric heat of adsorption ( $Q_{st}$ ) plotted against CO<sub>2</sub> uptake for **4**.

### $Q_{st}$ Analyses

To extract the coverage-dependent isosteric heat of adsorption, the adsorption data were modeled with a virial-type expression<sup>1</sup> composed of parameters  $a_i$  and  $b_i$ , which are independent from temperature:

$$\ln P = \ln N + \frac{1}{T} \sum_{i=0}^m a_i N^i + \sum_{i=0}^n b_i N^i \quad (1)$$

$$Q_{st} = -R \sum_{i=0}^m a_i N^i \quad (2)$$

Where  $P$  is pressure,  $N$  is the amount adsorbed (or uptake),  $T$  is temperature,  $m$  and  $n$  determine the number of terms that required describing the isotherm adequately, and  $R$  is the universal gas constant. The  $Q_{st}$  was calculated by fitting the adsorption data at different temperature in the pressure range of 0 ~ 1 bar.

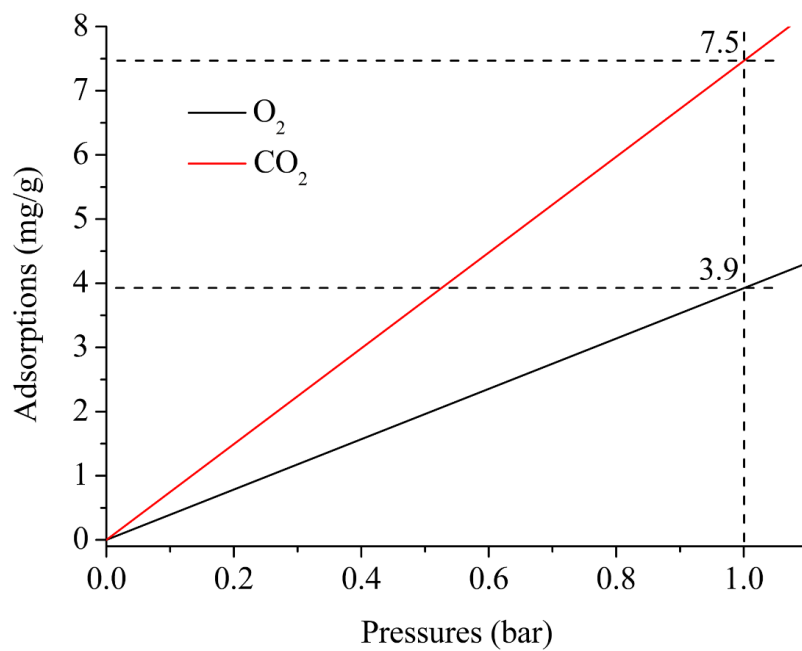

**Figure S16.** O<sub>2</sub> and CO<sub>2</sub> adsorption isotherms for **4** at 298 K and pressures of up to 1 bar.

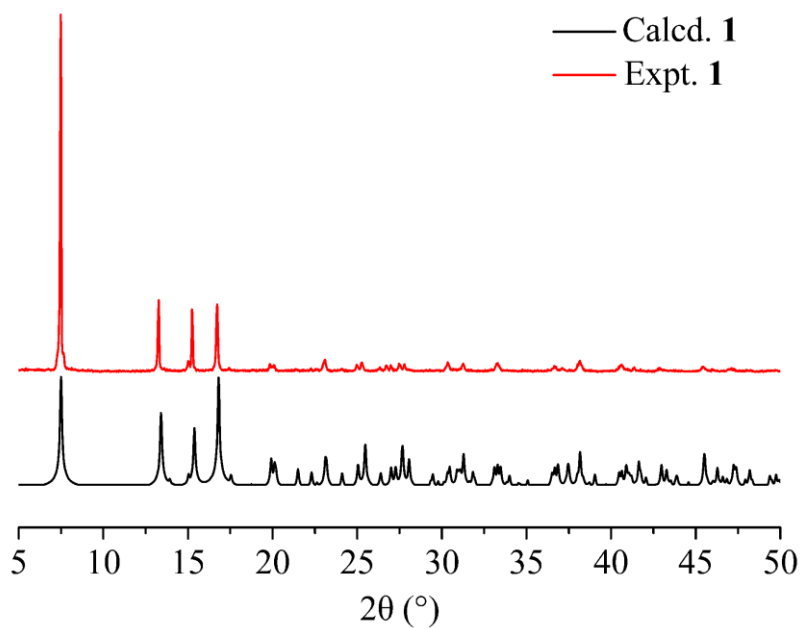

**Figure S17.** Calculated and simulated PXRD patterns of compound **1**.

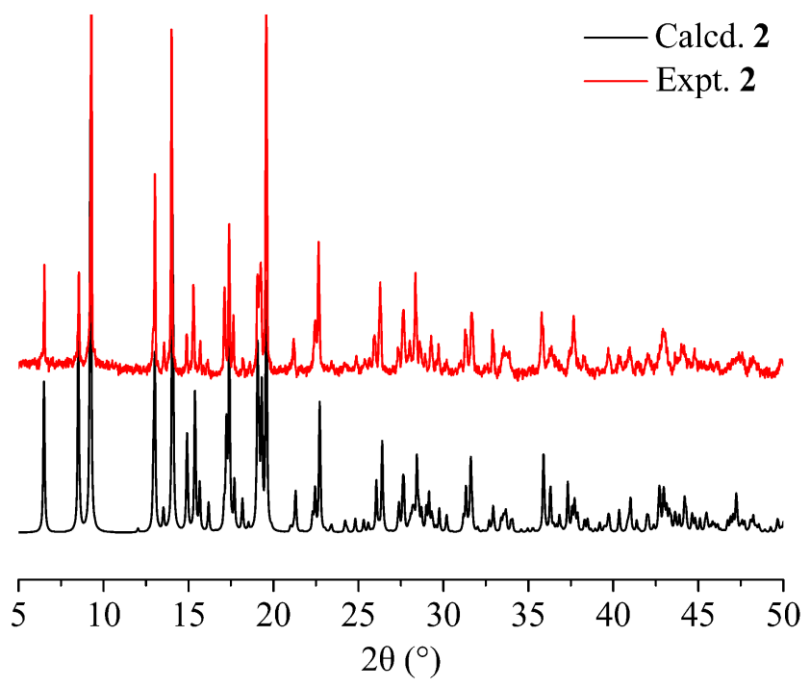

**Figure S18.** Calculated and simulated PXR D patterns of compound 2.

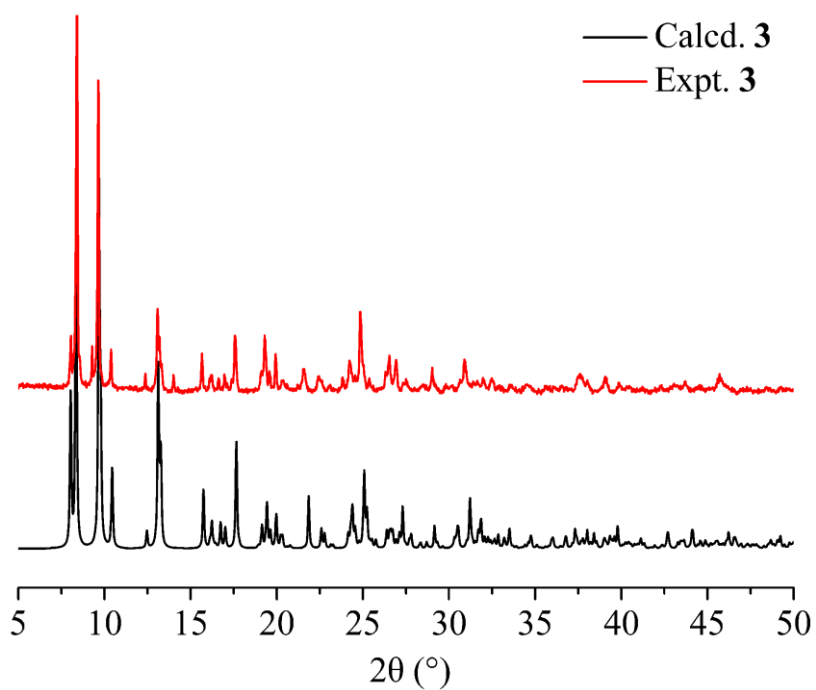

**Figure S19.** Calculated and simulated PXR D patterns of compound 3.

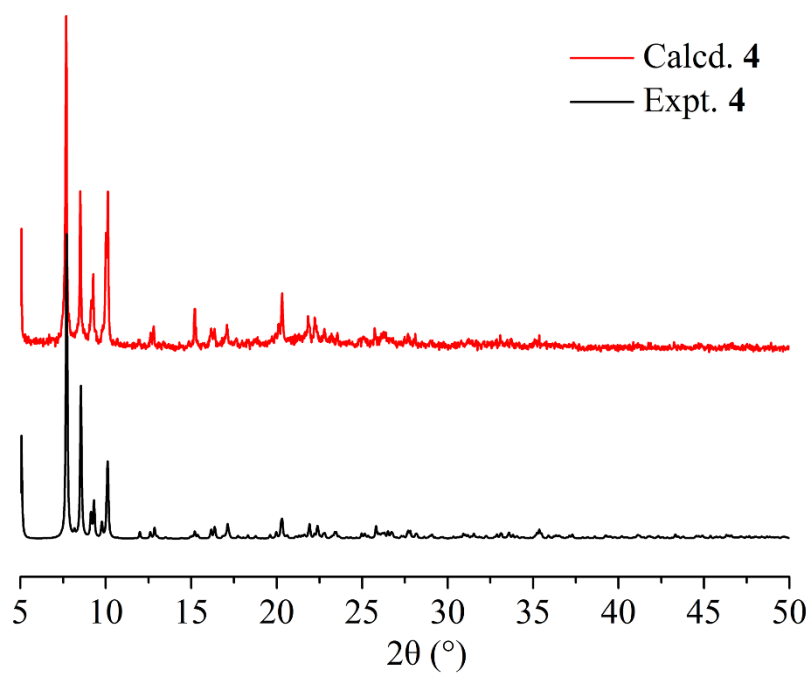

**Figure S20.** Calculated and simulated PXRD patterns of compound 4.

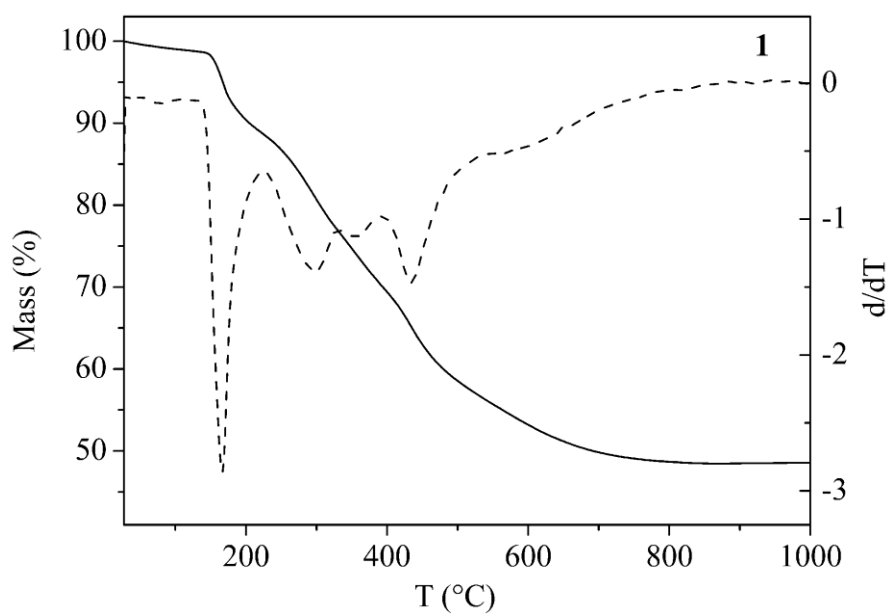

**Figure S21.** TG-DTG curves of compound 1.



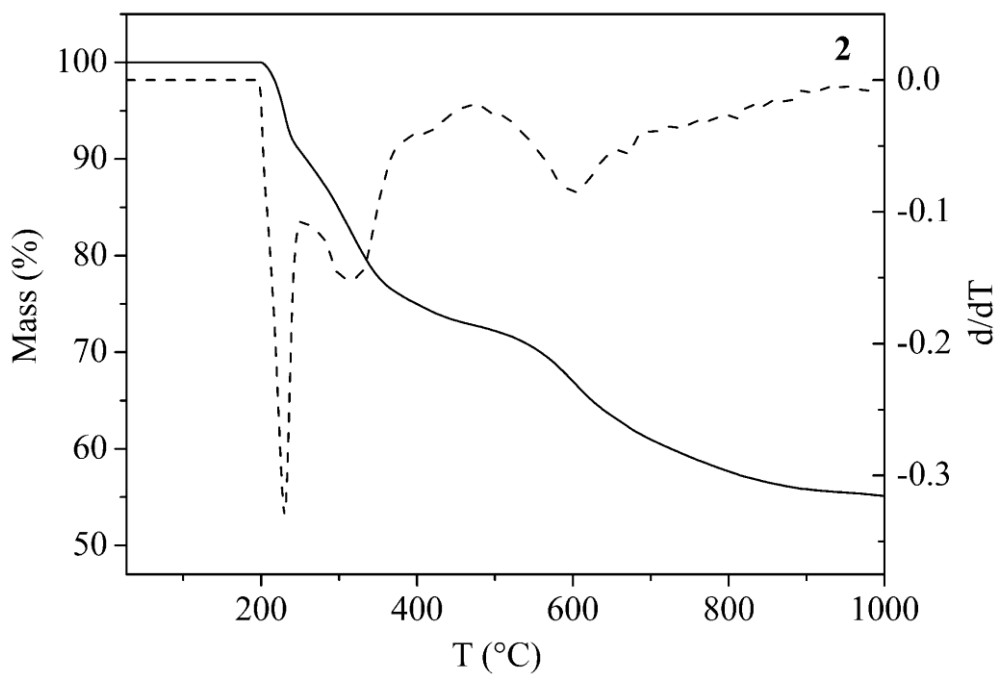

**Figure S22.** TG-DTG curves of compound **2**.

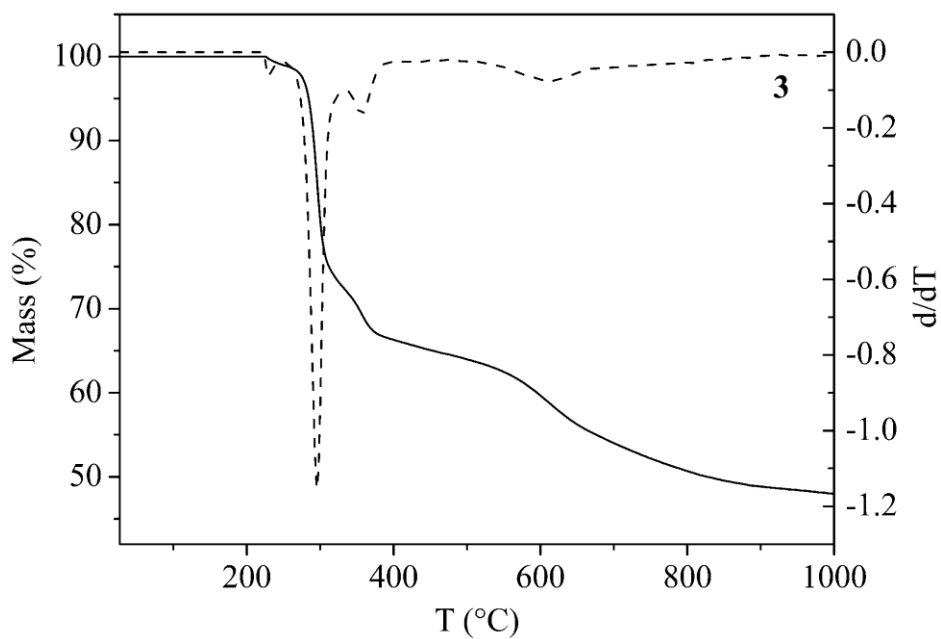

**Figure S23.** TG-DTG curves of compound **3**.

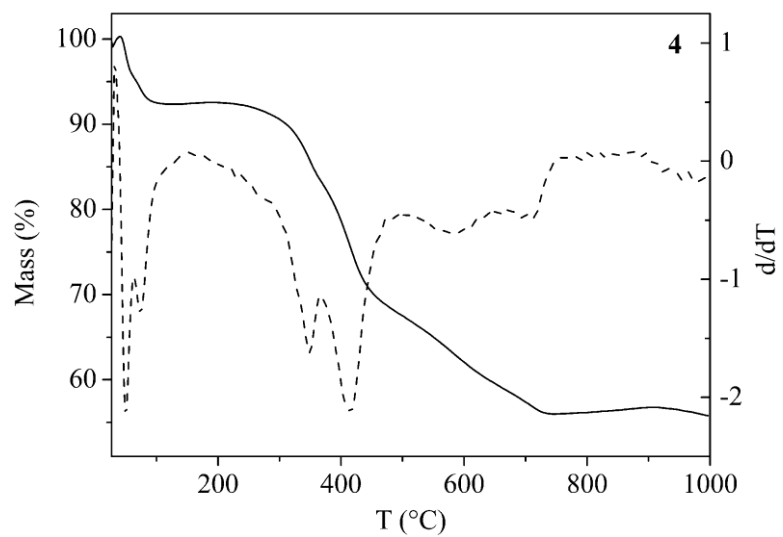

**Figure S24.** TG-DTG curves of compound **4**.

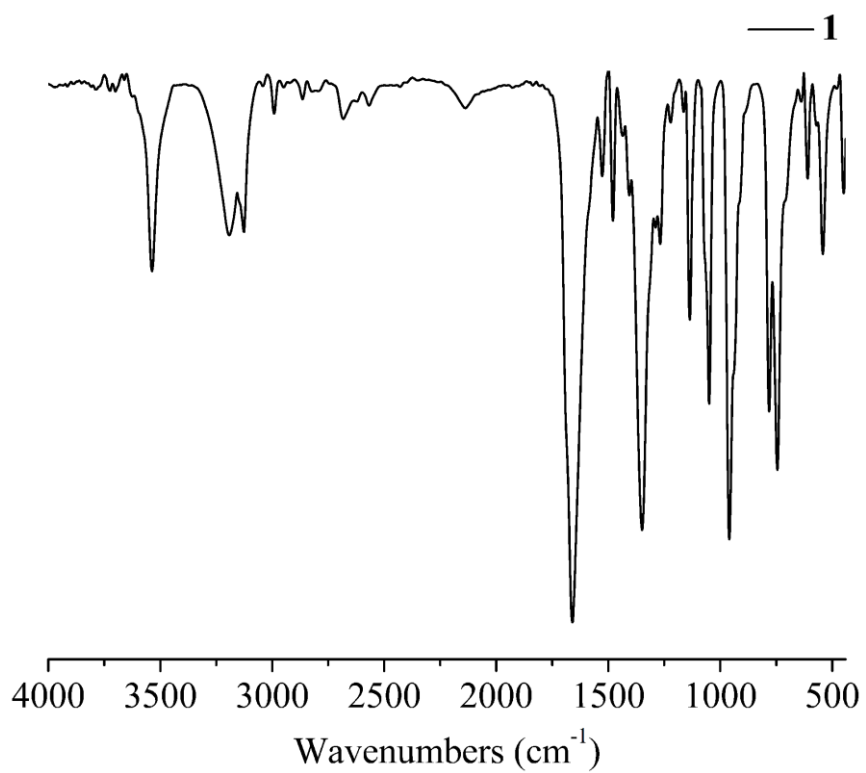

**Figure S25.** IR spectrum of compound **1**.

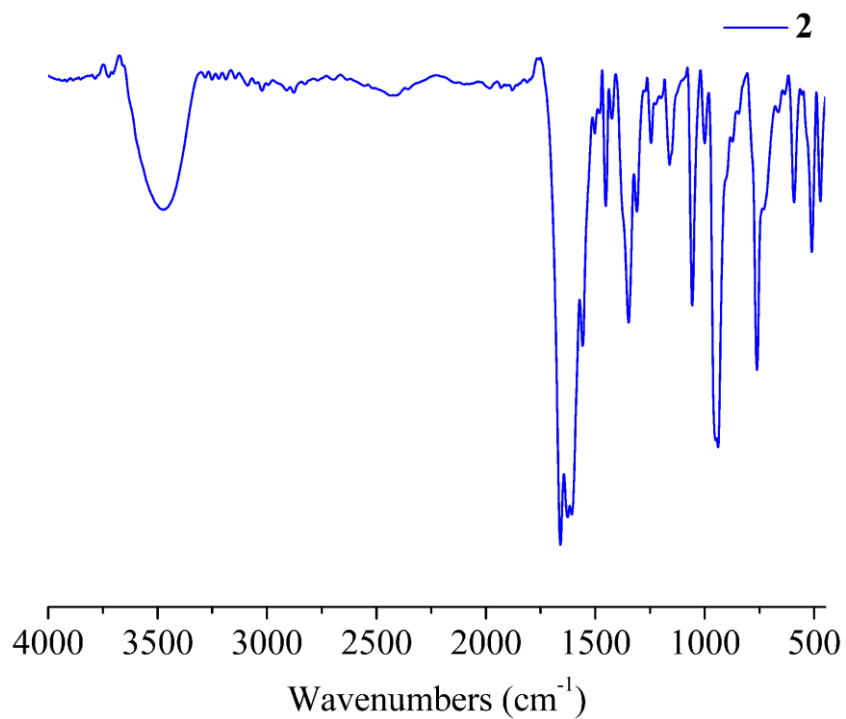

**Figure S26.** IR spectrum of compound 2.

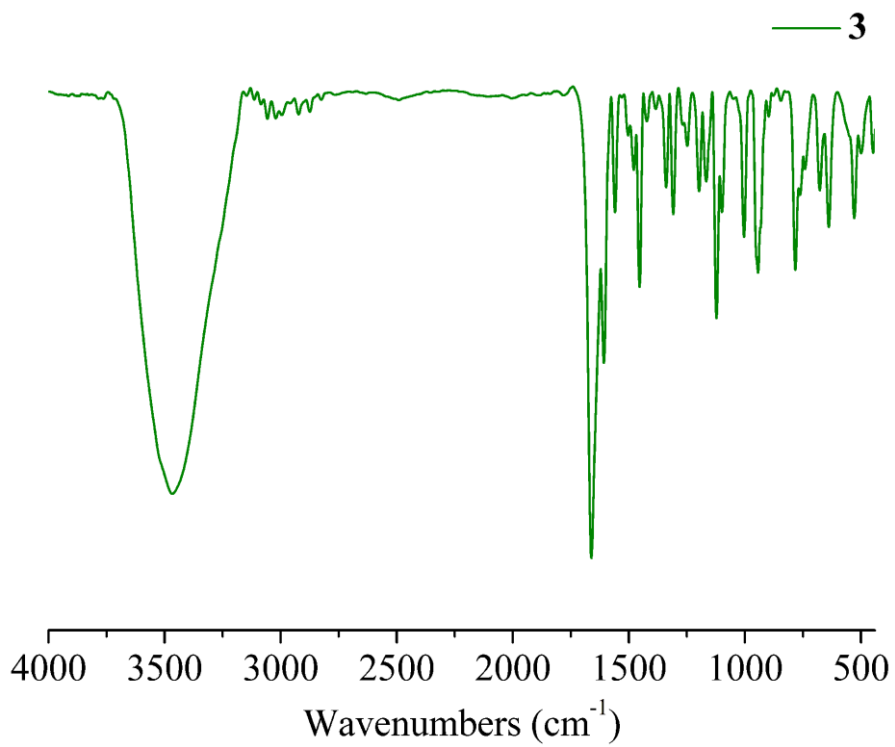

**Figure S27.** IR spectrum of compound 3.

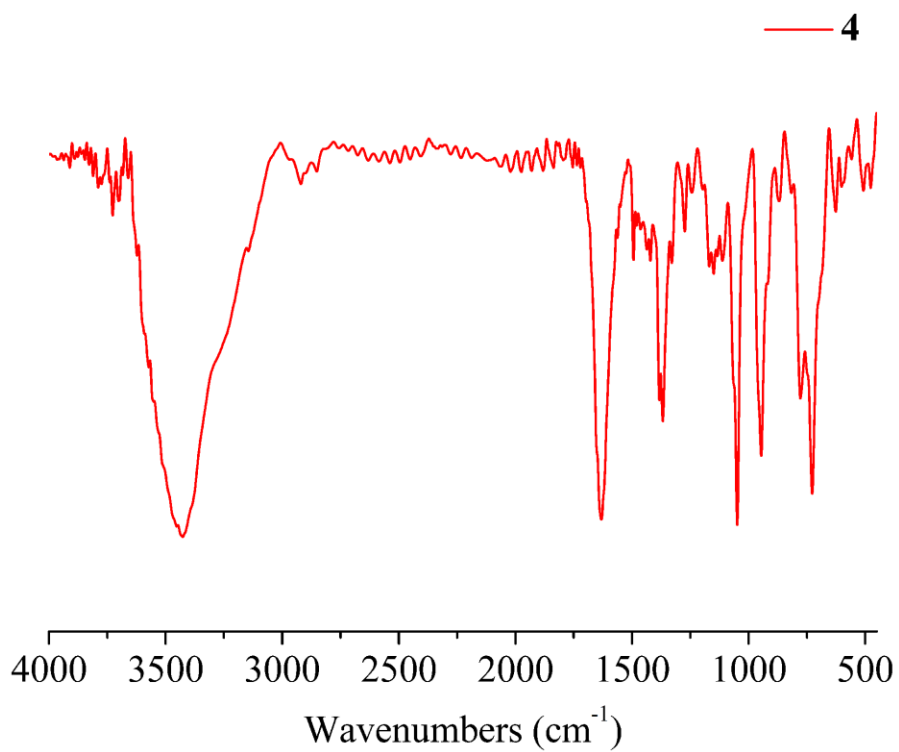

**Figure S28.** IR spectrum of compound 4.

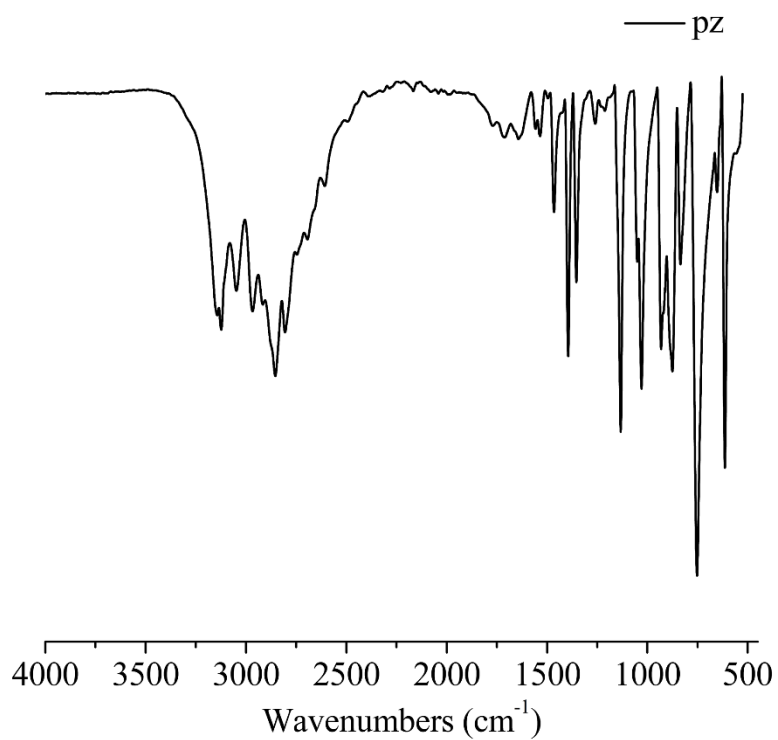

**Figure S29.** IR spectrum of pyrazole ligands.

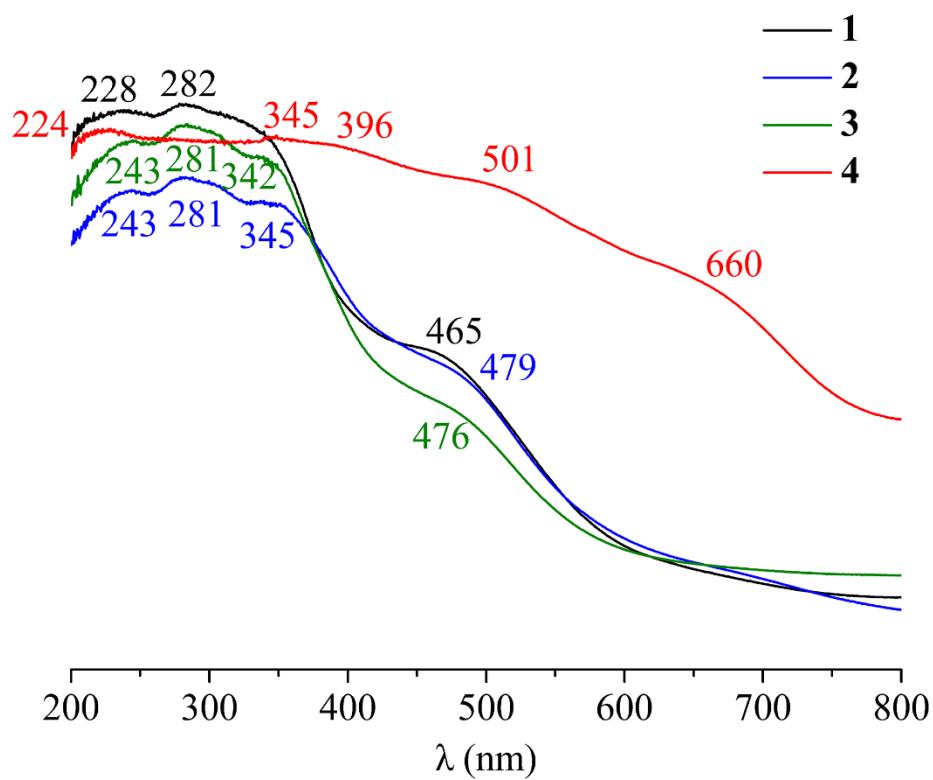

**Figure S30.** Solid-state UV-vis reflective spectra for 1 ~ 4.

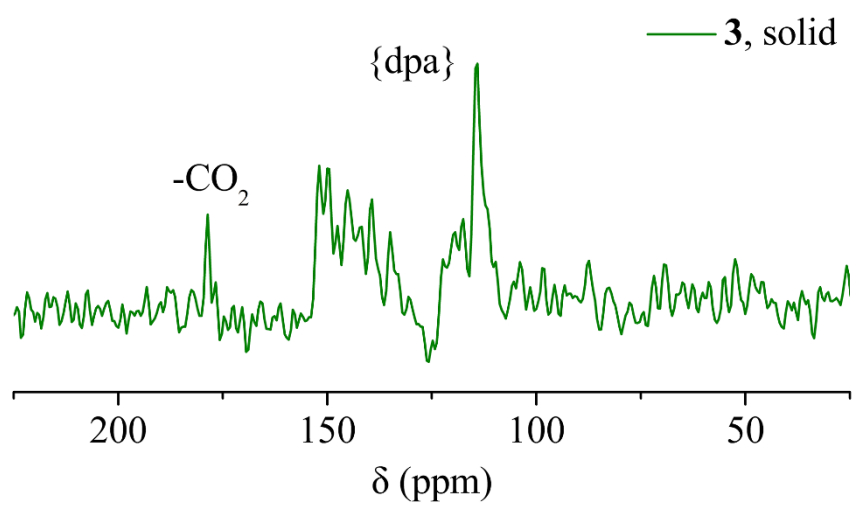

**Figure S31.** Solid-state  $^{13}\text{C}$  NMR spectrum for 3.



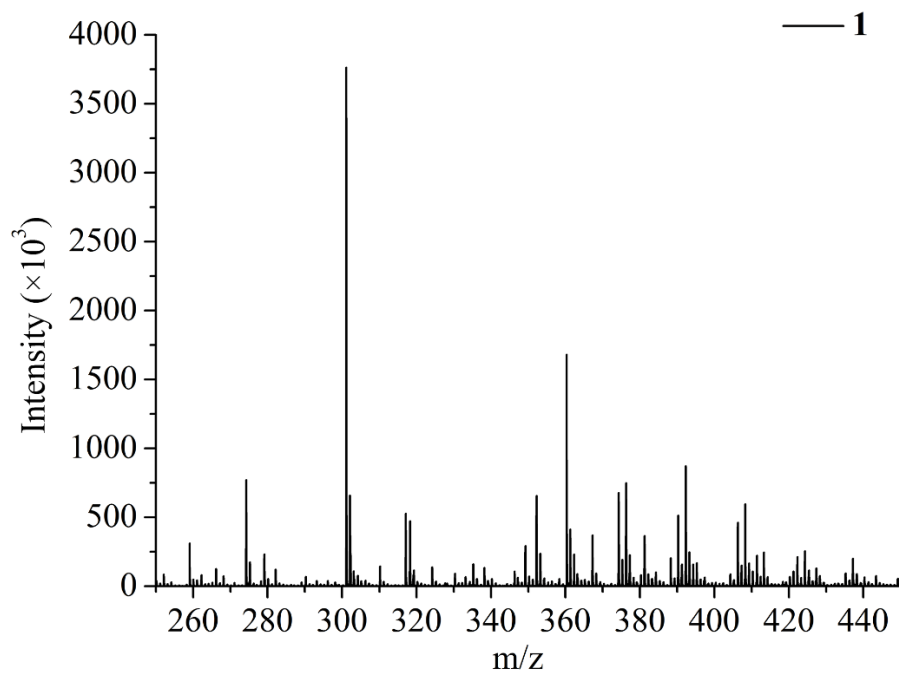

**Figure S32.** Positive ion electrospray ionization mass spectra (ESI-MS) of **1** in MeOH solution.

**Table S1.** Crystallographic data and structural refinements for complexes [Mo<sub>2</sub>O<sub>2</sub>(μ<sub>2</sub>-O)(μ<sub>2</sub>-S)(Hglyc)<sub>2</sub>(Hpz)<sub>2</sub>]·H<sub>2</sub>O (**1**), (Hdpa)[Mo<sub>2</sub>O<sub>2</sub>(μ<sub>2</sub>-S)<sub>2</sub>(Hglyc)(glyc)(H<sub>2</sub>O)] (**2**), (Hdpa)<sub>4</sub>[Mo<sub>4</sub>O<sub>4</sub>(μ<sub>3</sub>-O)<sub>2</sub>(μ<sub>2</sub>-S)<sub>2</sub>(glyc)<sub>2</sub>(S<sub>2</sub>O<sub>3</sub>)<sub>2</sub>] (**3**) and Na<sub>2</sub>[Mo<sub>16</sub>O<sub>12</sub>(μ<sub>2</sub>-O)<sub>6</sub>(μ<sub>2</sub>-OH)<sub>2</sub>(μ<sub>3</sub>-O)<sub>12</sub>(glyc)<sub>4</sub>(Hpz)<sub>4</sub>(pz)<sub>8</sub>]·28H<sub>2</sub>O (**4**) respectively.

| Identification codes                    | <b>1</b>                                                                         | <b>2</b>                                                                                     | <b>3</b>                                                                                       | <b>4</b>                                                                                         |
|-----------------------------------------|----------------------------------------------------------------------------------|----------------------------------------------------------------------------------------------|------------------------------------------------------------------------------------------------|--------------------------------------------------------------------------------------------------|
| Empirical formula                       | C <sub>10</sub> H <sub>16</sub> Mo <sub>2</sub> N <sub>4</sub> O <sub>10</sub> S | C <sub>14</sub> H <sub>17</sub> Mo <sub>2</sub> N <sub>3</sub> O <sub>9</sub> S <sub>2</sub> | C <sub>44</sub> H <sub>44</sub> Mo <sub>4</sub> N <sub>12</sub> O <sub>18</sub> S <sub>6</sub> | C <sub>44</sub> H <sub>50</sub> Mo <sub>16</sub> N <sub>24</sub> Na <sub>2</sub> O <sub>46</sub> |
| Formula weight                          | 576.2                                                                            | 627.3                                                                                        | 1605.03                                                                                        | 3232.1                                                                                           |
| Temperature/K                           | 100.00(1)                                                                        | 230.00(1)                                                                                    | 100.00(2)                                                                                      | 100.00(1)                                                                                        |
| Crystal system                          | orthorhombic                                                                     | triclinic                                                                                    | triclinic                                                                                      | monoclinic                                                                                       |
| Space group                             | <i>Pnma</i>                                                                      | <i>P</i> $\bar{1}$                                                                           | <i>P</i> $\bar{1}$                                                                             | <i>C</i> 2/ <i>c</i>                                                                             |
| <i>a</i> /Å                             | 13.1969(3)                                                                       | 6.8529(3)                                                                                    | 11.1684(2)                                                                                     | 43.6195(7)                                                                                       |
| <i>b</i> /Å                             | 23.5561(7)                                                                       | 10.7593(4)                                                                                   | 11.2139(2)                                                                                     | 13.7952(1)                                                                                       |
| <i>c</i> /Å                             | 5.9279(2)                                                                        | 14.1435(6)                                                                                   | 11.8751(2)                                                                                     | 20.6277(3)                                                                                       |
| $\alpha$ /°                             | 90                                                                               | 74.526(3)                                                                                    | 104.928(1)                                                                                     | 90                                                                                               |
| $\beta$ /°                              | 90                                                                               | 85.918(3)                                                                                    | 103.841(1)                                                                                     | 121.411(2)                                                                                       |
| $\gamma$ /°                             | 90                                                                               | 89.947(3)                                                                                    | 98.2450(4)                                                                                     | 90                                                                                               |
| Volume/Å <sup>3</sup>                   | 1842.79(9)                                                                       | 1002.31(7)                                                                                   | 1361.60(4)                                                                                     | 10593.5(3)                                                                                       |
| <i>Z</i>                                | 4                                                                                | 2                                                                                            | 1                                                                                              | 4                                                                                                |
| $\rho_{\text{calc}}$ /g/cm <sup>3</sup> | 2.077                                                                            | 2.079                                                                                        | 1.957                                                                                          | 2.027                                                                                            |
| $\mu$ /mm <sup>-1</sup>                 | 12.766                                                                           | 12.704                                                                                       | 10.264                                                                                         | 15.783                                                                                           |
| <i>F</i> (000)                          | 1136.0                                                                           | 620.0                                                                                        | 800.0                                                                                          | 6176.0                                                                                           |
| Crystal size/mm <sup>3</sup>            | 0.1 × 0.1 × 0.05                                                                 | 0.35 × 0.1 × 0.02                                                                            | 0.3 × 0.2 × 0.05                                                                               | 0.1 × 0.05 × 0.03                                                                                |
| Radiation (Å)                           | Cu K $\alpha$ ( $\lambda$ = 1.54184)                                             | Cu K $\alpha$ ( $\lambda$ = 1.54184)                                                         | Cu K $\alpha$ ( $\lambda$ = 1.54184)                                                           | Cu K $\alpha$ ( $\lambda$ = 1.54184)                                                             |
| 2 $\theta$ range for data collection/°  | 7.506 to 154.864                                                                 | 6.502 to 143.176                                                                             | 8.048 to 149.66                                                                                | 4.748 to 146.146                                                                                 |

|                                                    |                                                                      |                                                                      |                                                                        |                                                                        |
|----------------------------------------------------|----------------------------------------------------------------------|----------------------------------------------------------------------|------------------------------------------------------------------------|------------------------------------------------------------------------|
| Index ranges                                       | $-11 \leq h \leq 16,$<br>$-29 \leq k \leq 27,$<br>$-7 \leq l \leq 7$ | $-8 \leq h \leq 7,$<br>$-12 \leq k \leq 13,$<br>$-17 \leq l \leq 17$ | $-11 \leq h \leq 13,$<br>$-14 \leq k \leq 13,$<br>$-14 \leq l \leq 11$ | $-53 \leq h \leq 53,$<br>$-13 \leq k \leq 17,$<br>$-25 \leq l \leq 25$ |
| Reflections collected                              | 6129                                                                 | 7558                                                                 | 13703                                                                  | 30981                                                                  |
| Independent reflections                            | 1873 ( $R_{\text{int}} = 0.0219, R_{\sigma} = 0.0220$ )              | 3887 ( $R_{\text{int}} = 0.0807, R_{\sigma} = 0.0754$ )              | 5299 ( $R_{\text{int}} = 0.0338, R_{\sigma} = 0.0392$ )                | 10101 ( $R_{\text{int}} = 0.0431, R_{\sigma} = 0.0424$ )               |
| Data/restraints/parameters                         | 1873/0/131                                                           | 3887/4/277                                                           | 5299/0/387                                                             | 10101/1/598                                                            |
| Goodness-of-fit on $F^2$                           | 1.178                                                                | 1.141                                                                | 1.045                                                                  | 1.044                                                                  |
| Final $R$ indexes [ $I \geq 2\sigma$ ( $I$ )]      | $R_1 = 0.0348,$<br>$wR_2 = 0.0957$                                   | $R_1 = 0.0598,$<br>$wR_2 = 0.1808$                                   | $R_1 = 0.0461,$<br>$wR_2 = 0.1098$                                     | $R_1 = 0.0469,$<br>$wR_2 = 0.1243$                                     |
| Final $R$ indexes [all data]                       | $R_1 = 0.0376,$<br>$wR_2 = 0.0973$                                   | $R_1 = 0.0806,$<br>$wR_2 = 0.2167$                                   | $R_1 = 0.0469,$<br>$wR_2 = 0.1103$                                     | $R_1 = 0.0584,$<br>$wR_2 = 0.1322$                                     |
| Largest diff. peak/hole/ $e \cdot \text{\AA}^{-3}$ | 0.46/-0.91                                                           | 2.02/-1.95                                                           | 3.25/-1.20                                                             | 1.59/-0.92                                                             |

**Table S2.** Selected hydrogen bond distances (Å) and angles (°) in [Mo<sub>2</sub>O<sub>2</sub>(μ<sub>2</sub>-O)(μ<sub>2</sub>-S)(Hglyc)<sub>2</sub>(Hpz)<sub>2</sub>]·H<sub>2</sub>O (**1**).

|       | D–H···A                    | D–H(Å) | H···A(Å) | D···A(Å) | D–H···A(°) |
|-------|----------------------------|--------|----------|----------|------------|
| Intra | O1w–H1wA···O1 <sup>a</sup> | 0.87   | 1.74     | 2.597(6) | 170        |
|       | N2–H2···O2                 | 0.88   | 2.52     | 2.896(5) | 106        |
|       | N2–H2···O5 <sup>b</sup>    | 0.88   | 1.98     | 2.761(5) | 147        |
| Intra | O1w–H1wB···O2 <sup>c</sup> | 0.87   | 2.36     | 3.191(4) | 160        |
|       | O3–H3···O1w                | 0.84   | 1.81     | 2.645(4) | 172        |
|       | C3–H3A···O5 <sup>d</sup>   | 0.95   | 2.28     | 3.162(5) | 153        |
|       | C5–H5···O4 <sup>a</sup>    | 0.95   | 2.24     | 3.146(5) | 159        |

Symmetry codes: (a)  $x, y, -1 + z$ ; (b)  $-1/2 + x, y, 3/2 - z$ ; (c)  $1/2 + x, 3/2 - y, 1/2 - z$ ; (d)  $1/2 - x, 1 - y, -1/2 + z$ .

**Table S3.** Selected hydrogen bond distances (Å) and angles (°) in (Hdpa)[Mo<sub>2</sub>O<sub>2</sub>(μ<sub>2</sub>-S)<sub>2</sub>(Hglyc)(glyc)(H<sub>2</sub>O)] (**2**).

|       | D–H···A                        | D–H(Å)  | H···A(Å) | D···A(Å) | D–H···A(°) |
|-------|--------------------------------|---------|----------|----------|------------|
| Intra | N1–H1···O5                     | 0.87    | 2.09     | 2.900(1) | 154        |
| Intra | N2–H2···N3                     | 0.87    | 1.94     | 2.618(1) | 134        |
|       | N2–H2···O8 <sup>a</sup>        | 0.87    | 2.35     | 3.041(1) | 137        |
|       | O4–H4···S1 <sup>b</sup>        | 0.86(3) | 2.85(7)  | 3.477(7) | 132(8)     |
|       | O4–H4···O1 <sup>b</sup>        | 0.86(3) | 1.78(5)  | 2.574(9) | 154(9)     |
|       | O1w–<br>H1wA···O3 <sup>c</sup> | 0.85    | 1.75     | 2.588(1) | 167        |
|       | O1w–<br>H1wB···O6 <sup>d</sup> | 0.85    | 1.75     | 2.596(1) | 172        |
|       | C1–H1A···O9 <sup>b</sup>       | 0.98    | 2.59     | 3.450(1) | 146        |
|       | C12–H12···O2 <sup>c</sup>      | 0.94    | 2.54     | 3.074(2) | 116        |

Symmetry codes: (a)  $1 - x, -y, 1 - z$ ; (b)  $2 - x, 1 - y, -z$ ; (c)  $x, -1 + y, z$ ; (d)  $1 + x, y, z$ .

**Table S4.** Selected hydrogen bond distances (Å) and angles (°) in (Hdpa)<sub>4</sub>[Mo<sub>4</sub>O<sub>4</sub>(μ<sub>3</sub>-O)<sub>2</sub>(μ<sub>2</sub>-S)<sub>2</sub>(glyc)<sub>2</sub>(S<sub>2</sub>O<sub>3</sub>)<sub>2</sub>] (**3**).

|       | D–H ⋯ A                   | D–H(Å)  | H ⋯ A(Å) | D ⋯ A(Å) | D–H ⋯ A(°) |
|-------|---------------------------|---------|----------|----------|------------|
| Intra | N1–H1 ⋯ O8                | 0.86    | 2.01     | 2.821(7) | 156        |
| Intra | N2–H2 ⋯ N3                | 0.86    | 1.9      | 2.575(6) | 135        |
| Intra | N4–H4A ⋯ O9               | 0.86    | 2.21     | 3.009(7) | 155        |
| Intra | N5–H5 ⋯ N6                | 0.86    | 1.96     | 2.627(6) | 134        |
| Intra | C1–H1A ⋯ O9               | 0.90(6) | 2.57(6)  | 3.115(7) | 120(4)     |
|       | C7–H7 ⋯ O5 <sup>a</sup>   | 0.93    | 2.23     | 3.106(7) | 158        |
|       | C9–H9 ⋯ O2 <sup>b</sup>   | 0.93    | 2.58     | 3.032(7) | 110        |
| Intra | C11–H11 ⋯ O7              | 0.93    | 2.42     | 3.333(7) | 167        |
|       | C13–H13 ⋯ O4 <sup>c</sup> | 0.93    | 2.39     | 3.292(7) | 164        |
|       | C14–H14 ⋯ O2 <sup>d</sup> | 0.93    | 2.55     | 3.158(7) | 124        |
|       | C19–H19 ⋯ O6 <sup>e</sup> | 0.93    | 2.49     | 3.242(7) | 138        |
|       | C20–H20 ⋯ O3 <sup>f</sup> | 0.93    | 2.58     | 3.315(7) | 136        |
|       | C23–H23 ⋯ O3 <sup>d</sup> | 0.93    | 2.36     | 3.183(7) | 148        |

Symmetry codes: (a)  $1 - x, -y, 1 - z$ ; (b)  $1 - x, -y, -z$ ; (c)  $x, 1 + y, 1 + z$ ; (d)  $1 - x, 1 - y, 1 - z$ ; (e)  $-x, -y, -z$ ; (f)  $-x, 1 - y, -z$ .

**Table S5.** Selected hydrogen bond distances (Å) and angles (°) in Na<sub>2</sub>[Mo<sub>16</sub>O<sub>12</sub>(μ<sub>2</sub>-O)<sub>6</sub>(μ<sub>2</sub>-OH)<sub>2</sub>(μ<sub>3</sub>-O)<sub>12</sub>(glyc)<sub>4</sub>(Hpz)<sub>4</sub>(pz)<sub>8</sub>]·28H<sub>2</sub>O (**4**).

|       | D–H ⋯ A                    | D–H(Å)  | H ⋯ A(Å) | D ⋯ A(Å) | D–H ⋯ A(°) |
|-------|----------------------------|---------|----------|----------|------------|
| Intra | N6–H6 ⋯ O1 <sup>a</sup>    | 0.88    | 2.41     | 2.871(7) | 113        |
| Intra | N6–H6 ⋯ O8 <sup>a</sup>    | 0.88    | 2.3      | 3.123(9) | 156        |
| Intra | N12–H12 ⋯ O4               | 0.88    | 2.29     | 3.158(1) | 168        |
| Intra | O16–H16 ⋯ O1               | 0.87(6) | 1.96(6)  | 2.797(7) | 161(7)     |
| Intra | C1–H1A ⋯ N11               | 0.99    | 2.62     | 3.219(1) | 119        |
| Intra | C3–H3A ⋯ O11               | 0.99    | 2.35     | 2.878(8) | 113        |
| Intra | C7–H7 ⋯ O6 <sup>a</sup>    | 0.95    | 2.48     | 3.223(1) | 135        |
| Intra | C14–H14 ⋯ O20 <sup>a</sup> | 0.95    | 2.58     | 3.506(1) | 164        |
|       | C18–H18 ⋯ O10 <sup>b</sup> | 0.95    | 2.48     | 3.387(1) | 159        |
|       | C22–H22 ⋯ O1w <sup>c</sup> | 0.95    | 2.55     | 3.381(2) | 146        |
|       | C22–H22 ⋯ O7 <sup>d</sup>  | 0.95    | 2.5      | 3.178(9) | 129        |

Symmetric codes: (a)  $\frac{1}{2} - x, \frac{1}{2} - y, 1 - z$ ; (b)  $1 - x, y, \frac{3}{2} - z$ ; (c)  $x, 1 - y, \frac{1}{2} + z$ ; (d)  $x, -y, \frac{1}{2} + z$ .



**Table S6.** Bond valence calculations for complexes **1** ~ **4** respectively.

| Complexes                                                                                                                                                                              | Atoms     | N         | $\sum S_{ij}$             | d                         |
|----------------------------------------------------------------------------------------------------------------------------------------------------------------------------------------|-----------|-----------|---------------------------|---------------------------|
| $[\text{Mo}_2\text{O}_2(\mu_2\text{-O})(\mu_2\text{-S})(\text{Hglyc})_2(\text{Hpz})_2] \cdot \text{H}_2\text{O}$ ( <b>1</b> )                                                          | <b>Mo</b> | <b>5+</b> | <b>5.317</b>              | <b>0.317</b>              |
| $(\text{Hdpa})[\text{Mo}_2\text{O}_2(\mu_2\text{-S})_2(\text{Hglyc})(\text{glyc})(\text{H}_2\text{O})]$ ( <b>2</b> )                                                                   | Mo1       | 5+        | 5.080                     | 0.080                     |
|                                                                                                                                                                                        | Mo2       | 5+        | 5.199                     | 0.199                     |
|                                                                                                                                                                                        |           | <b>5+</b> | <b>5.140<sub>av</sub></b> | <b>0.140<sub>av</sub></b> |
| $(\text{Hdpa})_4[\text{Mo}_4\text{O}_4(\mu_3\text{-O})_2(\mu_2\text{-S})_2(\text{glyc})_2(\text{S}_2\text{O}_3)_2]$ ( <b>3</b> )                                                       | Mo1       | 5+        | 5.245                     | 0.245                     |
|                                                                                                                                                                                        | Mo2       | 5+        | 5.077                     | 0.077                     |
|                                                                                                                                                                                        |           | <b>5+</b> | <b>5.161<sub>av</sub></b> | <b>0.161<sub>av</sub></b> |
|                                                                                                                                                                                        | Mo1       | 4+        | 3.959                     | 0.041                     |
|                                                                                                                                                                                        | Mo2       | 4+        | 4.269                     | 0.269                     |
| $\text{Na}_2[\text{Mo}_{16}\text{O}_{12}(\mu_2\text{-O})_6(\mu_2\text{-OH})_2(\mu_3\text{-O})_{12}(\text{glyc})_4(\text{Hpz})_4(\text{pz})_8] \cdot 28\text{H}_2\text{O}$ ( <b>4</b> ) |           | <b>4+</b> | <b>4.114<sub>av</sub></b> | <b>0.114<sub>av</sub></b> |
|                                                                                                                                                                                        | Mo3       | 5+        | 5.433                     | 0.433                     |
|                                                                                                                                                                                        | Mo4       | 5+        | 5.335                     | 0.335                     |
|                                                                                                                                                                                        | Mo5       | 5+        | 5.213                     | 0.213                     |
|                                                                                                                                                                                        | Mo6       | 5+        | 5.279                     | 0.279                     |
|                                                                                                                                                                                        | Mo7       | 5+        | 5.252                     | 0.252                     |
|                                                                                                                                                                                        | Mo8       | 5+        | 5.202                     | 0.202                     |
|                                                                                                                                                                                        |           | <b>5+</b> | <b>5.286<sub>av</sub></b> | <b>0.286<sub>av</sub></b> |

**Table S7.** Selected bond distances (Å) and angles (°) in [Mo<sub>2</sub>O<sub>2</sub>(μ<sub>2</sub>-O)(μ<sub>2</sub>-S)(Hglyc)<sub>2</sub>(Hpz)<sub>2</sub>]·H<sub>2</sub>O (**1**).

| <b>Atom–Atom</b>              | <b>Length/Å</b> | <b>Atom–Atom</b>              | <b>Length/Å</b> |
|-------------------------------|-----------------|-------------------------------|-----------------|
| Mo(1)–Mo(1) <sup>1</sup>      | 2.6741(6)       | Mo(1)–O(2)                    | 1.684(3)        |
| Mo(1)–S(1)                    | 2.3312(11)      | Mo(1)–O(4)                    | 2.085(3)        |
| Mo(1)–O(3)                    | 2.260(3)        | Mo(1)–N(1)                    | 2.222(3)        |
| Mo(1)–O(1)                    | 1.936(3)        |                               |                 |
| <b>Atom–Atom–Atom</b>         | <b>Angle/°</b>  | <b>Atom–Atom–Atom</b>         | <b>Angle/°</b>  |
| S(1)–Mo(1)–Mo(1) <sup>1</sup> | 55.00(2)        | N(1)–Mo(1)–Mo(1) <sup>1</sup> | 145.40(9)       |
| O(3)–Mo(1)–Mo(1) <sup>1</sup> | 100.56(7)       | N(1)–Mo(1)–S(1)               | 90.65(9)        |
| O(3)–Mo(1)–S(1)               | 85.41(8)        | N(1)–Mo(1)–O(3)               | 78.3(1)         |
| O(1)–Mo(1)–Mo(1) <sup>1</sup> | 46.32(8)        | Mo(1)–S(1)–Mo(1) <sup>1</sup> | 69.99(4)        |
| O(1)–Mo(1)–S(1)               | 97.58(9)        | Mo(1)–S(1)–Mo(1) <sup>1</sup> | 83.0(1)         |
| O(1)–Mo(1)–O(3)               | 87.6(1)         | Mo(1)–O(1)–Mo(1) <sup>1</sup> | 87.4(2)         |
| O(1)–Mo(1)–O(4)               | 83.7(1)         | O(2)–Mo(1)–O(4)               | 96.6(1)         |
| O(1)–Mo(1)–N(1)               | 163.1(1)        | O(2)–Mo(1)–N(1)               | 87.1(1)         |
| O(2)–Mo(1)–Mo(1) <sup>1</sup> | 97.5(1)         | O(4)–Mo(1)–Mo(1) <sup>1</sup> | 129.96(9)       |
| O(2)–Mo(1)–S(1)               | 105.5(1)        | O(4)–Mo(1)–S(1)               | 156.63(9)       |
| O(2)–Mo(1)–O(3)               | 161.9(1)        | O(4)–Mo(1)–O(3)               | 71.3(1)         |
| O(2)–Mo(1)–O(1)               | 104.8(2)        |                               |                 |

Symmetric codes: <sup>1</sup>  $x, 3/2 - y, z$ .

**Table S8.** Selected bond distances (Å) and angles (°) in (Hdpa)[Mo<sub>2</sub>O<sub>2</sub>(μ<sub>2</sub>-S)<sub>2</sub>(Hglyc)(glyc)(H<sub>2</sub>O)] (2).

| <b>Atom–Atom</b> | <b>Length/Å</b> | <b>Atom–Atom</b> | <b>Length/Å</b> |
|------------------|-----------------|------------------|-----------------|
| Mo(2)–Mo(1)      | 2.8050(9)       | Mo(2)–O(8)       | 1.672(6)        |
| Mo(2)–S(1)       | 2.305(2)        | Mo(1)–S(1)       | 2.307(2)        |
| Mo(2)–S(2)       | 2.301(3)        | Mo(1)–S(2)       | 2.314(3)        |
| Mo(2)–O(4)       | 2.265(6)        | Mo(1)–O(2)       | 2.064(7)        |
| Mo(2)–O(1w)      | 2.178(6)        | Mo(1)–O(7)       | 1.676(7)        |
| Mo(2)–O(5)       | 2.145(6)        | Mo(1)–O(1)       | 2.027(6)        |

  

| <b>Atom–Atom–Atom</b> | <b>Angle/°</b> | <b>Atom–Atom–Atom</b> | <b>Angle/°</b> |
|-----------------------|----------------|-----------------------|----------------|
| S(1)–Mo(2)–Mo(1)      | 52.57(6)       | O(1)–Mo(1)–S(2)       | 141.0(2)       |
| S(2)–Mo(2)–Mo(1)      | 52.77(6)       | O(1)–Mo(1)–O(2)       | 75.7(3)        |
| S(2)–Mo(2)–S(1)       | 102.74(8)      | Mo(2)–S(1)–Mo(1)      | 74.93(8)       |
| O(4)–Mo(2)–Mo(1)      | 99.36(7)       | Mo(2)–S(2)–Mo(1)      | 74.86(9)       |
| O(4)–Mo(2)–S(1)       | 87.26(7)       | O(8)–Mo(2)–S(2)       | 101.9(3)       |
| O(4)–Mo(2)–S(2)       | 87.3(2)        | O(8)–Mo(2)–O(4)       | 162.0(3)       |
| O(1w)–Mo(2)–Mo(1)     | 136.72(8)      | O(8)–Mo(2)–O(1w)      | 90.9(4)        |
| O(1w)–Mo(2)–S(1)      | 84.18(8)       | O(8)–Mo(2)–O(5)       | 93.5(3)        |
| O(1w)–Mo(2)–S(2)      | 163.0(2)       | S(1)–Mo(1)–Mo(2)      | 52.51(6)       |
| O(1w)–Mo(2)–O(4)      | 77.5(3)        | S(1)–Mo(1)–S(2)       | 102.30(8)      |
| O(5)–Mo(2)–Mo(1)      | 139.43(9)      | S(2)–Mo(1)–Mo(2)      | 52.37(7)       |
| O(5)–Mo(2)–S(1)       | 156.21(9)      | O(2)–Mo(1)–Mo(2)      | 131.68(8)      |
| O(5)–Mo(2)–S(2)       | 86.89(9)       | O(2)–Mo(1)–S(1)       | 149.5(2)       |
| O(5)–Mo(2)–O(4)       | 71.3(2)        | O(2)–Mo(1)–S(2)       | 81.00(9)       |
| O(5)–Mo(2)–O(1w)      | 81.2(2)        | O(7)–Mo(1)–Mo(2)      | 102.7(2)       |
| O(8)–Mo(2)–Mo(1)      | 98.5(2)        | O(7)–Mo(1)–S(1)       | 105.4(3)       |
| O(8)–Mo(2)–S(1)       | 105.4(3)       | O(7)–Mo(1)–S(2)       | 106.9(3)       |
| O(1)–Mo(1)–Mo(2)      | 131.88(8)      | O(7)–Mo(1)–O(2)       | 102.4(3)       |
| O(1)–Mo(1)–S(1)       | 83.85(9)       | O(7)–Mo(1)–O(1)       | 108.4(3)       |

**Table S9.** Selected bond distances (Å) and angles (°) in (Hdpa)<sub>4</sub>[Mo<sub>4</sub>O<sub>4</sub>(μ<sub>3</sub>-O)<sub>2</sub>(μ<sub>2</sub>-S)<sub>2</sub>(glyc)<sub>2</sub>(S<sub>2</sub>O<sub>3</sub>)<sub>2</sub>] (**3**).

| Atom–Atom   | Length/Å  | Atom–Atom               | Length/Å  |
|-------------|-----------|-------------------------|-----------|
| Mo(1)–Mo(2) | 2.7167(5) | Mo(2)–S(1)              | 2.3254(2) |
| Mo(1)–S(1)  | 2.3250(2) | Mo(2)–S(2) <sup>1</sup> | 2.4883(4) |
| Mo(1)–O(5)  | 1.956(3)  | Mo(2)–O(5)              | 1.984(3)  |
| Mo(1)–O(1)  | 2.117(3)  | Mo(2)–O(5) <sup>1</sup> | 2.299(3)  |
| Mo(1)–O(2)  | 2.060(3)  | Mo(2)–O(1) <sup>1</sup> | 2.113(3)  |
| Mo(1)–O(7)  | 2.247(4)  | Mo(2)–O(6)              | 1.678(4)  |
| Mo(1)–O(4)  | 1.682(4)  |                         |           |

  

| Atom–Atom–Atom                 | Angle/°   | Atom–Atom–Atom                             | Angle/°   |
|--------------------------------|-----------|--------------------------------------------|-----------|
| S(1)–Mo(1)–Mo(2)               | 54.26(3)  | Mo(1)–S(1)–Mo(2)                           | 71.49(4)  |
| O(5)–Mo(1)–Mo(2)               | 46.82(1)  | O(5)–Mo(2)–Mo(1)                           | 45.99(9)  |
| O(5)–Mo(1)–S(1)                | 99.53(1)  | Mo(1)–O(5)–Mo(2)                           | 87.18(3)  |
| O(5)–Mo(1)–O(1)                | 74.40(3)  | Mo(1)–O(5)–Mo(2) <sup>1</sup>              | 108.27(4) |
| O(5)–Mo(1)–O(2)                | 148.53(3) | Mo(2)–O(5)–Mo(2) <sup>1</sup>              | 107.17(5) |
| O(5)–Mo(1)–O(7)                | 87.69(3)  | Mo(2) <sup>1</sup> –O(1)–Mo(1)             | 109.50(5) |
| O(1)–Mo(1)–Mo(2)               | 90.75(9)  | O(5) <sup>1</sup> –Mo(2)–S(1)              | 96.52(8)  |
| O(1)–Mo(1)–S(1)                | 94.62(1)  | O(5)–Mo(2)–S(1)                            | 98.72(1)  |
| O(1)–Mo(1)–O(7)                | 78.20(4)  | O(5)–Mo(2)–S(2) <sup>1</sup>               | 152.57(1) |
| O(2)–Mo(1)–Mo(2)               | 137.28(9) | O(5) <sup>1</sup> –Mo(2)–S(2) <sup>1</sup> | 80.29(9)  |
| O(2)–Mo(1)–S(1)                | 86.66(1)  | O(5)–Mo(2)–O(5) <sup>1</sup>               | 72.83(5)  |
| O(2)–Mo(1)–O(1)                | 74.36(3)  | O(5)–Mo(2)–O(1) <sup>1</sup>               | 85.23(3)  |
| O(2)–Mo(1)–O(7)                | 82.36(3)  | O(1) <sup>1</sup> –Mo(2)–Mo(1)             | 131.12(1) |
| O(7)–Mo(1)–Mo(2)               | 134.32(9) | O(1) <sup>1</sup> –Mo(2)–S(1)              | 162.10(1) |
| O(7)–Mo(1)–S(1)                | 168.16(1) | O(1) <sup>1</sup> –Mo(2)–S(2) <sup>1</sup> | 89.72(1)  |
| O(4)–Mo(1)–Mo(2)               | 103.02(2) | O(1) <sup>1</sup> –Mo(2)–O(5) <sup>1</sup> | 67.82(2)  |
| O(4)–Mo(1)–S(1)                | 103.53(3) | O(6)–Mo(2)–Mo(1)                           | 102.33(3) |
| O(4)–Mo(1)–O(5)                | 105.96(6) | O(6)–Mo(2)–S(1)                            | 105.15(3) |
| O(4)–Mo(1)–O(1)                | 161.41(6) | O(6)–Mo(2)–S(2) <sup>1</sup>               | 103.24(4) |
| O(4)–Mo(1)–O(2)                | 102.41(5) | O(6)–Mo(2)–O(5) <sup>1</sup>               | 158.33(5) |
| O(4)–Mo(1)–O(7)                | 83.23(6)  | O(6)–Mo(2)–O(5)                            | 103.76(6) |
| S(1)–Mo(2)–Mo(1)               | 54.25(3)  | O(6)–Mo(2)–O(1) <sup>1</sup>               | 90.69(5)  |
| S(1)–Mo(2)–S(2) <sup>1</sup>   | 78.72(4)  | O(5) <sup>1</sup> –Mo(2)–Mo(1)             | 90.58(8)  |
| S(2) <sup>1</sup> –Mo(2)–Mo(1) | 130.79(4) |                                            |           |

Symmetric codes: <sup>1</sup> -x, -y, -z.

**Table S10.** Selected bond distances (Å) and angles (°) in Na<sub>2</sub>[Mo<sub>16</sub>O<sub>12</sub>(μ<sub>2</sub>-O)<sub>6</sub>(μ<sub>2</sub>-OH)<sub>2</sub>(μ<sub>3</sub>-O)<sub>12</sub>(glyc)<sub>4</sub>(Hpz)<sub>4</sub>(pz)<sub>8</sub>]·28H<sub>2</sub>O (**4**).

| Atom–Atom                                    | Length/Å  | Atom–Atom         | Length/Å  |
|----------------------------------------------|-----------|-------------------|-----------|
| Mo(1)–Mo(1) <sup>1</sup>                     | 2.6340(9) | Mo(4)–O(5)        | 1.960(4)  |
| Mo(1)–Mo(2)                                  | 2.5588(7) | Mo(4)–O(17)       | 2.182(5)  |
| Mo(1)–Mo(2) <sup>1</sup>                     | 2.5620(7) | Mo(4)–O(4)        | 1.953(5)  |
| Mo(1)–O(3) <sup>1</sup>                      | 2.035(4)  | Mo(4)–O(18)       | 2.105(5)  |
| Mo(1)–O(2)                                   | 2.011(4)  | Mo(4)–O(7)        | 1.674(5)  |
| Mo(1)–O(1) <sup>1</sup>                      | 2.065(4)  | Mo(4)–N(9)        | 2.175(6)  |
| Mo(1)–O(1)                                   | 2.067(4)  | Mo(7)–O(13)       | 1.989(5)  |
| Mo(1)–N(7) <sup>1</sup>                      | 2.195(5)  | Mo(7)–O(9)        | 2.232(5)  |
| Mo(1)–N(1)                                   | 2.184(5)  | Mo(7)–O(12)       | 1.944(5)  |
| Mo(2)–O(3)                                   | 1.971(4)  | Mo(7)–O(14)       | 1.697(5)  |
| Mo(2)–O(2)                                   | 1.940(4)  | Mo(7)–N(10)       | 2.134(6)  |
| Mo(2)–O(1) <sup>1</sup>                      | 2.061(4)  | Mo(5)–O(16)       | 2.084(4)  |
| Mo(2)–O(13)                                  | 2.114(5)  | Mo(5)–O(9)        | 1.976(5)  |
| Mo(2)–N(3)                                   | 2.132(5)  | Mo(5)–O(8)        | 1.935(5)  |
| Mo(2)–N(5)                                   | 2.196(5)  | Mo(5)–O(17)       | 2.129(5)  |
| Mo(3)–Mo(4)                                  | 2.5944(7) | Mo(5)–O(10)       | 1.700(5)  |
| Mo(3)–O(3)                                   | 2.052(4)  | Mo(5)–N(11)       | 2.232(6)  |
| Mo(3)–O(5)                                   | 1.988(5)  | Mo(8)–O(13)       | 1.958(4)  |
| Mo(3)–O(16)                                  | 2.190(4)  | Mo(8)–O(20)       | 2.205(5)  |
| Mo(3)–O(6)                                   | 1.670(5)  | Mo(8)–O(12)       | 1.976(5)  |
| Mo(3)–O(4)                                   | 1.955(4)  | Mo(8)–O(21)       | 2.110(5)  |
| Mo(3)–N(8)                                   | 2.135(6)  | Mo(8)–O(15)       | 1.686(5)  |
| Mo(6)–Mo(5)                                  | 2.5778(7) | Mo(8)–N(4)        | 2.163(6)  |
| Mo(6)–O(2)                                   | 2.100(4)  | Mo(6)–O(11)       | 1.682(5)  |
| Mo(6)–O(20)                                  | 2.195(4)  | Mo(6)–N(2)        | 2.164(6)  |
| Mo(6)–O(9)                                   | 1.981(5)  | Mo(7)–Mo(8)       | 2.5753(8) |
| Mo(6)–O(8)                                   | 1.940(4)  | Mo(7)–O(5)        | 2.063(4)  |
| Atom–Atom–Atom                               | Angle/°   | Atom–Atom–Atom    | Angle/°   |
| Mo(2) <sup>1</sup> –Mo(1)–Mo(1) <sup>1</sup> | 58.99(2)  | O(13)–Mo(8)–Mo(7) | 49.79(3)  |
| Mo(2)–Mo(1)–Mo(1) <sup>1</sup>               | 59.10(2)  | O(13)–Mo(8)–O(20) | 90.88(7)  |
| Mo(2)–Mo(1)–Mo(2) <sup>1</sup>               | 118.09(2) | O(13)–Mo(8)–O(12) | 96.45(9)  |
| O(3) <sup>1</sup> –Mo(1)–Mo(1) <sup>1</sup>  | 96.41(2)  | O(13)–Mo(8)–O(21) | 162.7(2)  |
| O(3) <sup>1</sup> –Mo(1)–Mo(2) <sup>1</sup>  | 49.14(2)  | O(13)–Mo(8)–N(4)  | 83.65(9)  |
| O(3) <sup>1</sup> –Mo(1)–Mo(2)               | 140.35(2) | O(20)–Mo(8)–Mo(7) | 95.60(2)  |
| O(3) <sup>1</sup> –Mo(1)–O(1) <sup>1</sup>   | 88.79(7)  | O(12)–Mo(8)–Mo(7) | 48.41(4)  |
| O(3) <sup>1</sup> –Mo(1)–O(1)                | 99.41(7)  | O(12)–Mo(8)–O(20) | 82.59(9)  |
| O(3) <sup>1</sup> –Mo(1)–N(7) <sup>1</sup>   | 81.42(8)  | O(12)–Mo(8)–O(21) | 89.4(2)   |
| O(3) <sup>1</sup> –Mo(1)–N(1)                | 90.07(9)  | O(12)–Mo(8)–N(4)  | 167.4(2)  |
| O(2)–Mo(1)–Mo(1) <sup>1</sup>                | 92.94(2)  | O(21)–Mo(8)–Mo(7) | 137.80(5) |
| O(2)–Mo(1)–Mo(2)                             | 48.44(2)  | O(21)–Mo(8)–O(20) | 73.75(8)  |
| O(2)–Mo(1)–Mo(2) <sup>1</sup>                | 135.66(2) | O(21)–Mo(8)–N(4)  | 87.1(2)   |
| O(2)–Mo(1)–O(3) <sup>1</sup>                 | 170.15(7) | O(15)–Mo(8)–Mo(7) | 98.82(8)  |
| O(2)–Mo(1)–O(1) <sup>1</sup>                 | 99.58(7)  | O(15)–Mo(8)–O(13) | 105.2(2)  |

|                                             |           |                                             |           |
|---------------------------------------------|-----------|---------------------------------------------|-----------|
| O(2)–Mo(1)–O(1)                             | 84.20(7)  | O(15)–Mo(8)–O(20)                           | 163.1(2)  |
| O(2)–Mo(1)–N(7) <sup>1</sup>                | 93.67(8)  | O(15)–Mo(8)–O(12)                           | 100.5(2)  |
| O(2)–Mo(1)–N(1)                             | 80.46(9)  | O(15)–Mo(8)–O(21)                           | 89.6(2)   |
| O(1)–Mo(1)–Mo(1) <sup>1</sup>               | 50.36(1)  | O(15)–Mo(8)–N(4)                            | 91.6(2)   |
| O(1)–Mo(1)–Mo(1) <sup>1</sup>               | 50.43(1)  | N(4)–Mo(8)–Mo(7)                            | 133.42(4) |
| O(1)–Mo(1)–Mo(2)                            | 88.06(2)  | N(4)–Mo(8)–O(20)                            | 84.80(9)  |
| O(1) <sup>1</sup> –Mo(1)–Mo(2) <sup>1</sup> | 88.02(1)  | N(10)–Mo(7)–O(9)                            | 83.2(2)   |
| O(1) <sup>1</sup> –Mo(1)–Mo(2)              | 51.60(3)  | O(5)–Mo(4)–Mo(3)                            | 49.39(3)  |
| O(1)–Mo(1)–Mo(2) <sup>1</sup>               | 51.53(2)  | O(5)–Mo(4)–O(17)                            | 87.42(8)  |
| O(1) <sup>1</sup> –Mo(1)–O(1)               | 100.79(4) | O(5)–Mo(4)–O(18)                            | 161.34(9) |
| O(1) <sup>1</sup> –Mo(1)–N(7) <sup>1</sup>  | 87.68(7)  | O(5)–Mo(4)–N(9)                             | 83.8(2)   |
| O(1)–Mo(1)–N(7) <sup>1</sup>                | 171.49(7) | N(10)–Mo(7)–Mo(8)                           | 135.71(6) |
| O(1) <sup>1</sup> –Mo(1)–N(1)               | 164.37(7) | O(17)–Mo(4)–Mo(3)                           | 93.62(2)  |
| O(1)–Mo(1)–N(1)                             | 94.77(7)  | O(5)–Mo(7)–N(10)                            | 83.8(2)   |
| N(7) <sup>1</sup> –Mo(1)–Mo(1) <sup>1</sup> | 138.10(3) | O(4)–Mo(4)–Mo(3)                            | 48.44(3)  |
| N(7) <sup>1</sup> –Mo(1)–Mo(2) <sup>1</sup> | 130.44(4) | O(4)–Mo(4)–O(5)                             | 96.16(9)  |
| N(7) <sup>1</sup> –Mo(1)–Mo(2)              | 96.70(4)  | O(4)–Mo(4)–O(17)                            | 83.64(9)  |
| N(1)–Mo(1)–Mo(1) <sup>1</sup>               | 145.11(4) | O(4)–Mo(4)–O(18)                            | 86.2(2)   |
| N(1)–Mo(1)–Mo(2)                            | 128.32(5) | O(4)–Mo(4)–N(9)                             | 161.5(2)  |
| N(1)–Mo(1)–Mo(2) <sup>1</sup>               | 102.95(4) | O(14)–Mo(7)–O(12)                           | 104.9(2)  |
| N(1)–Mo(1)–N(7) <sup>1</sup>                | 76.74(9)  | O(18)–Mo(4)–Mo(3)                           | 134.47(5) |
| Mo(1)–Mo(2)–Mo(1) <sup>1</sup>              | 61.91(2)  | O(18)–Mo(4)–O(17)                           | 74.42(8)  |
| O(3)–Mo(2)–Mo(1)                            | 100.56(3) | O(18)–Mo(4)–N(9)                            | 88.1(2)   |
| O(3)–Mo(2)–Mo(1) <sup>1</sup>               | 51.37(3)  | O(14)–Mo(7)–O(9)                            | 168.8(2)  |
| O(3)–Mo(2)–O(1) <sup>1</sup>                | 101.78(7) | O(7)–Mo(4)–Mo(3)                            | 103.79(7) |
| O(3)–Mo(2)–O(13)                            | 89.67(7)  | O(7)–Mo(4)–O(5)                             | 106.8(2)  |
| O(3)–Mo(2)–N(3)                             | 162.67(9) | O(7)–Mo(4)–O(17)                            | 162.2(2)  |
| O(3)–Mo(2)–N(5)                             | 86.73(8)  | O(7)–Mo(4)–O(4)                             | 104.9(2)  |
| O(2)–Mo(2)–Mo(1) <sup>1</sup>               | 96.92(3)  | O(7)–Mo(4)–O(18)                            | 90.3(2)   |
| O(2)–Mo(2)–Mo(1)                            | 50.87(3)  | O(7)–Mo(4)–N(9)                             | 92.7(2)   |
| O(2)–Mo(2)–O(3)                             | 98.66(7)  | O(13)–Mo(7)–O(9)                            | 84.21(7)  |
| O(2)–Mo(2)–O(1) <sup>1</sup>                | 102.13(7) | N(9)–Mo(4)–Mo(3)                            | 133.01(6) |
| O(2)–Mo(2)–O(13)                            | 81.75(7)  | N(9)–Mo(4)–O(17)                            | 77.9(2)   |
| O(2)–Mo(2)–N(3)                             | 95.14(8)  | O(14)–Mo(7)–N(10)                           | 91.8(2)   |
| O(2)–Mo(2)–N(5)                             | 171.5(2)  | Mo(1) <sup>1</sup> –O(3)–Mo(3)              | 129.0(2)  |
| O(1) <sup>1</sup> –Mo(2)–Mo(1) <sup>1</sup> | 51.74(1)  | Mo(2)–O(3)–Mo(1) <sup>1</sup>               | 79.49(5)  |
| O(1) <sup>1</sup> –Mo(2)–Mo(1)              | 51.74(1)  | Mo(2)–O(3)–Mo(3)                            | 148.8(2)  |
| O(1) <sup>1</sup> –Mo(2)–O(13)              | 167.09(6) | Mo(1)–O(2)–Mo(6)                            | 130.0(2)  |
| O(1) <sup>1</sup> –Mo(2)–N(3)               | 85.41(9)  | Mo(2)–O(2)–Mo(1)                            | 80.69(6)  |
| O(1) <sup>1</sup> –Mo(2)–N(5)               | 83.01(9)  | Mo(2)–O(2)–Mo(6)                            | 148.4(2)  |
| O(13)–Mo(2)–Mo(1) <sup>1</sup>              | 140.59(1) | Mo(1) <sup>1</sup> –O(1)–Mo(1)              | 79.21(4)  |
| O(13)–Mo(2)–Mo(1)                           | 132.39(2) | Mo(2) <sup>1</sup> –O(1)–Mo(1)              | 76.73(5)  |
| O(13)–Mo(2)–N(3)                            | 82.0(2)   | Mo(2) <sup>1</sup> –O(1)–Mo(1) <sup>1</sup> | 76.66(4)  |
| O(13)–Mo(2)–N(5)                            | 91.81(9)  | Mo(3)–O(5)–Mo(7)                            | 149.1(2)  |
| N(3)–Mo(2)–Mo(1)                            | 96.28(5)  | Mo(4)–O(5)–Mo(3)                            | 82.16(7)  |
| N(3)–Mo(2)–Mo(1) <sup>1</sup>               | 137.02(6) | Mo(4)–O(5)–Mo(7)                            | 128.3(2)  |
| N(3)–Mo(2)–N(5)                             | 78.45(9)  | Mo(7)–O(13)–Mo(2)                           | 146.4(2)  |
| N(5)–Mo(2)–Mo(1)                            | 134.74(6) | Mo(8)–O(13)–Mo(2)                           | 125.3(2)  |

|                               |           |                   |           |
|-------------------------------|-----------|-------------------|-----------|
| N(5)–Mo(2)–Mo(1) <sup>1</sup> | 91.54(5)  | Mo(8)–O(13)–Mo(7) | 81.45(7)  |
| O(3)–Mo(3)–Mo(4)              | 139.37(2) | Mo(5)–O(16)–Mo(3) | 133.8(2)  |
| O(3)–Mo(3)–O(16)              | 76.37(6)  | Mo(6)–O(20)–Mo(8) | 124.6(2)  |
| O(3)–Mo(3)–N(8)               | 83.49(8)  | O(13)–Mo(7)–Mo(8) | 48.76(2)  |
| O(5)–Mo(3)–Mo(4)              | 48.45(3)  | O(13)–Mo(7)–O(5)  | 89.55(8)  |
| O(5)–Mo(3)–O(3)               | 91.53(8)  | Mo(6)–O(9)–Mo(7)  | 133.5(2)  |
| O(5)–Mo(3)–O(16)              | 81.90(8)  | Mo(5)–O(9)–Mo(6)  | 81.28(8)  |
| O(5)–Mo(3)–N(8)               | 164.03(9) | Mo(5)–O(9)–Mo(7)  | 141.6(2)  |
| O(16)–Mo(3)–Mo(4)             | 89.22(2)  | Mo(5)–O(8)–Mo(6)  | 83.38(8)  |
| O(6)–Mo(3)–Mo(4)              | 98.17(7)  | Mo(7)–O(12)–Mo(8) | 82.13(8)  |
| O(6)–Mo(3)–O(3)               | 96.0(2)   | Mo(5)–O(17)–Mo(4) | 127.6(2)  |
| O(6)–Mo(3)–O(5)               | 100.8(2)  | O(13)–Mo(7)–N(10) | 166.8(2)  |
| O(6)–Mo(3)–O(16)              | 172.1(2)  | O(9)–Mo(7)–Mo(8)  | 92.45(2)  |
| O(6)–Mo(3)–O(4)               | 103.7(2)  | O(5)–Mo(7)–O(9)   | 76.58(7)  |
| O(6)–Mo(3)–N(8)               | 94.8(2)   | Mo(4)–O(4)–Mo(3)  | 83.19(8)  |
| O(4)–Mo(3)–Mo(4)              | 48.38(4)  | O(16)–Mo(5)–Mo(6) | 97.94(2)  |
| O(4)–Mo(3)–O(3)               | 157.54(9) | O(16)–Mo(5)–O(17) | 79.90(8)  |
| O(4)–Mo(3)–O(5)               | 95.20(9)  | O(16)–Mo(5)–N(11) | 76.08(9)  |
| O(4)–Mo(3)–O(16)              | 83.39(8)  | O(9)–Mo(5)–Mo(6)  | 49.44(4)  |
| O(4)–Mo(3)–N(8)               | 84.2(2)   | O(9)–Mo(5)–O(16)  | 88.71(7)  |
| N(8)–Mo(3)–Mo(4)              | 132.55(4) | O(9)–Mo(5)–O(17)  | 92.96(9)  |
| N(8)–Mo(3)–O(16)              | 82.18(8)  | O(9)–Mo(5)–N(11)  | 164.7(2)  |
| O(2)–Mo(6)–Mo(5)              | 102.88(1) | O(8)–Mo(5)–Mo(6)  | 48.39(3)  |
| O(2)–Mo(6)–O(20)              | 76.33(6)  | O(8)–Mo(5)–O(16)  | 85.92(8)  |
| O(2)–Mo(6)–N(2)               | 76.52(8)  | O(8)–Mo(5)–O(9)   | 95.60(9)  |
| O(20)–Mo(6)–Mo(5)             | 136.84(3) | O(8)–Mo(5)–O(17)  | 163.25(9) |
| O(9)–Mo(6)–Mo(5)              | 49.28(3)  | O(8)–Mo(5)–N(11)  | 85.0(2)   |
| O(9)–Mo(6)–O(2)               | 90.12(7)  | O(17)–Mo(5)–Mo(6) | 142.38(3) |
| O(9)–Mo(6)–O(20)              | 87.67(8)  | O(17)–Mo(5)–N(11) | 82.9(2)   |
| O(9)–Mo(6)–N(2)               | 165.69(9) | O(10)–Mo(5)–Mo(6) | 99.62(7)  |
| O(8)–Mo(6)–Mo(5)              | 48.23(4)  | O(10)–Mo(5)–O(16) | 162.0(2)  |
| O(8)–Mo(6)–O(2)               | 91.20(7)  | O(10)–Mo(5)–O(9)  | 105.8(2)  |
| O(8)–Mo(6)–O(20)              | 167.21(8) | O(10)–Mo(5)–O(8)  | 102.8(2)  |
| O(8)–Mo(6)–O(9)               | 95.28(9)  | O(10)–Mo(5)–O(17) | 88.6(2)   |
| O(8)–Mo(6)–N(2)               | 80.1(2)   | O(10)–Mo(5)–N(11) | 88.9(2)   |
| O(11)–Mo(6)–Mo(5)             | 99.75(7)  | N(11)–Mo(5)–Mo(6) | 133.42(5) |
| O(11)–Mo(6)–O(2)              | 157.3(2)  | O(12)–Mo(7)–Mo(8) | 49.47(5)  |
| O(11)–Mo(6)–O(20)             | 87.9(2)   | O(12)–Mo(7)–O(5)  | 159.87(8) |
| O(11)–Mo(6)–O(9)              | 105.6(2)  | O(12)–Mo(7)–O(13) | 96.48(9)  |
| O(11)–Mo(6)–O(8)              | 103.2(2)  | O(12)–Mo(7)–O(9)  | 84.92(8)  |
| O(11)–Mo(6)–N(2)              | 88.7(2)   | O(12)–Mo(7)–N(10) | 86.3(2)   |
| N(2)–Mo(6)–Mo(5)              | 128.32(5) | O(14)–Mo(7)–Mo(8) | 98.13(7)  |
| N(2)–Mo(6)–O(20)              | 94.00(9)  | O(14)–Mo(7)–O(5)  | 92.9(2)   |
| O(5)–Mo(7)–Mo(8)              | 138.06(3) | O(14)–Mo(7)–O(13) | 99.9(2)   |

Symmetric codes: <sup>1</sup>  $\frac{1}{2} - x, \frac{1}{2} - y, 1 - z$ .

**Table S11.** Detail calibrated adsorption data of O<sub>2</sub>, N<sub>2</sub> and CO<sub>2</sub> for Na<sub>2</sub>[Mo<sub>16</sub>O<sub>12</sub>(μ<sub>2</sub>-O)<sub>6</sub>(μ<sub>2</sub>-OH)<sub>2</sub>(μ<sub>3</sub>-O)<sub>12</sub>(glyc)<sub>4</sub>(Hpz)<sub>4</sub>(pz)<sub>8</sub>]·28H<sub>2</sub>O (4) at 298 K.

| Gases            | O <sub>2</sub> |                   | CO <sub>2</sub> |                   | CH <sub>4</sub> |                   | N <sub>2</sub> |                   | H <sub>2</sub> |                   |
|------------------|----------------|-------------------|-----------------|-------------------|-----------------|-------------------|----------------|-------------------|----------------|-------------------|
| Temperature (°C) | Pressure (bar) | Adsorption (mg/g) | Pressure (bar)  | Adsorption (mg/g) | Pressure (bar)  | Adsorption (mg/g) | Pressure (bar) | Adsorption (mg/g) | Pressure (bar) | Adsorption (mg/g) |
| 25.0             | 0              | 0                 | 0               | 0                 | 0               | 0                 | 0              | 0                 | 0              | 0                 |
|                  | 0.890          | 3.4998            | 0.892           | 6.6610            | 0.892           | 1.85039           | 0.890          | 1.6038            | 0.892          | 0.892             |
|                  | 1.890          | 5.2060            | 1.890           | 9.3815            | 1.890           | 2.69209           | 1.900          | 2.6457            | 1.890          | 1.890             |
|                  | 3.900          | 8.1738            | 3.892           | 12.4707           | 3.892           | 3.11232           | 3.891          | 3.3619            | 3.892          | 3.892             |
|                  | 5.898          | 10.9607           | 5.896           | 15.3245           | 5.896           | 3.39305           | 5.900          | 3.3120            | 5.896          | 5.896             |
|                  | 7.895          | 13.5227           | 7.894           | 16.9496           | 7.894           | 3.84454           | 7.900          | 3.7706            | 7.894          | 7.894             |
|                  | 9.900          | 16.2109           | 9.895           | 18.1760           | 9.895           | 4.13023           | 9.900          | 3.7187            | 9.895          | 9.895             |
|                  | 11.900         | 18.7349           | 11.892          | 20.2010           | 11.892          | 4.05501           | 11.898         | 3.5520            | 11.892         | 11.892            |
|                  | 13.896         | 21.4256           | 13.895          | 20.6612           | 13.895          | 4.48924           | 13.895         | 2.8474            | 13.895         | 13.895            |
|                  | 15.896         | 24.2378           | 15.899          | 20.5404           | 15.899          | 4.24398           | 15.896         | 2.3342            | 15.899         | 15.899            |
|                  | 17.890         | 26.7388           | 17.899          | 22.4261           | 17.899          | 4.49908           | 17.894         | 3.1299            | 17.899         | 17.899            |
|                  | 19.896         | 29.7496           | 19.894          | 22.5480           | 19.894          | 4.17718           | 19.898         | 3.3014            | 19.894         | 19.894            |
|                  | 21.894         | 32.2922           | 21.895          | 23.1963           | 21.895          | 4.04903           | 21.894         | 3.3090            | 21.895         | 21.895            |
|                  | 23.894         | 34.7491           | 23.891          | 23.7147           | 23.891          | 4.39791           | 23.894         | 3.1755            | 23.891         | 23.891            |
|                  | 25.893         | 37.0642           | 25.895          | 23.3122           | 25.895          | 4.41047           | 25.895         | 2.3057            | 25.895         | 25.895            |
|                  | 27.891         | 39.5402           | 27.894          | 23.1564           | 27.894          | 4.34825           | 27.897         | 2.8725            | 27.894         | 27.894            |
|                  | 29.891         | 42.2306           | 29.890          | 21.2955           | 29.890          | 4.26905           | 29.894         | 2.6617            | 29.890         | 29.890            |



**Table S12.** Comparisons of O<sub>2</sub> adsorption data for **4** with some other adsorbents at different conditions.

| Adsorbents                                                          | Species | Amounts (mmol·g <sup>-1</sup> ) | Pressure (bar) | Temperature (K) |
|---------------------------------------------------------------------|---------|---------------------------------|----------------|-----------------|
| <b>4</b>                                                            |         | 0.123                           | 1              | 298             |
|                                                                     |         | 1.320                           | 30             | 298             |
| MOF-177 <sup>2</sup>                                                | MOF     | 0.18                            | 1              | 298             |
| SNU-50 <sup>3</sup>                                                 |         | 34.6                            | 0.70           | 87              |
| SNU-9 <sup>4</sup>                                                  |         | 12.3                            | 0.61           | 87              |
| Zeolite 5A <sup>5</sup>                                             | Zeolite | 0.10                            | 0.96           | 303             |
| SBFO <sup>6</sup>                                                   |         | 0.31                            | 1              | 723             |
| SrCo <sub>0.8</sub> Fe <sub>0.2</sub> O <sub>3-δ</sub> <sup>7</sup> |         | 0.40                            | 1              | 773             |
| COP-1 <sup>8</sup>                                                  | COP     | 0.12                            | 1.3            | 298             |
| COP-2 <sup>8</sup>                                                  |         | 0.20                            | 1.3            | 298             |
| COP-3 <sup>8</sup>                                                  |         | 0.17                            | 1.3            | 298             |
| COP-4 <sup>8</sup>                                                  |         | 0.18                            | 1.3            | 298             |
| AgF <sup>9</sup>                                                    | salt    | 0.0075                          | 1              | 295             |
| AgCl <sup>9</sup>                                                   |         | 0.0067                          | 1              | 295             |
| AgBr/SiO <sub>2</sub> <sup>9</sup>                                  |         | 0.243                           | 1              | 295             |

**Table S13.** Comparisons of CO<sub>2</sub> adsorption data for **4** with the other typical MOFs at 298 K.

| Adsorbents                                                                                              | Amounts (mmol·g <sup>-1</sup> ) | Pressure (bar) |
|---------------------------------------------------------------------------------------------------------|---------------------------------|----------------|
| <b>4</b>                                                                                                | 0.170                           | 1              |
|                                                                                                         | 0.484                           | 30             |
| Mg-MOF-1 <sup>10</sup>                                                                                  | 0.614                           | 1              |
| MOF-253 <sup>11</sup>                                                                                   | 1.409                           | 1              |
| [Fe(III)(Tp)(CN) <sub>3</sub> ] <sub>2</sub> Co(II) <sup>12</sup>                                       | 0.682                           | 1              |
| Co(doborDC) <sub>2</sub> (py) <sup>13</sup>                                                             | 0.364                           | 1              |
| Ni <sub>3</sub> (pzdc) <sub>2</sub> (7H-ade) <sub>2</sub> (H <sub>2</sub> O) <sub>4</sub> <sup>14</sup> | 2.228                           | 1              |
| HKUST-1 <sup>15</sup>                                                                                   | 4.182                           | 1              |
| SNU-50 <sup>3</sup>                                                                                     | 3.114                           | 1              |
| ZIF-78 <sup>16</sup>                                                                                    | 2.068                           | 1              |
| IMOF-3 <sup>17</sup>                                                                                    | 1.955                           | 1              |
| Cd-ADA-1 <sup>18</sup>                                                                                  | 0.773                           | 1              |

List of abbreviations: Tp = hydrotris(pyrazolyl)borate; doborDC = 1,12-dihydroxycarbonyl-1,12-dicarba-closo-dodecaborane, py = pyridine; pzdc = 2,3-pyrazinedicarboxylate, ade = adenine.

**Table S14.** Solid  $^{13}\text{C}$  NMR spectral data (ppm) of **1** ~ **4**.

| Compound | $\delta$ ( $-\text{CO}_2$ ) | $\delta$ ( $-\text{CO}$ ) | $\delta$ ( $-\text{CH}$ )                          |
|----------|-----------------------------|---------------------------|----------------------------------------------------|
| <b>1</b> | 175.23                      | 61.69                     | 108.27,<br>133.98,<br>143.69<br>117.15,<br>136.03, |
| <b>2</b> | 181.86,<br>186.79           | 65.61,<br>69.72           | 140.06,<br>143.11,<br>146.65,<br>151.47            |
| <b>3</b> | 178.60                      | –                         | 114.72 ~ 152.22                                    |
| <b>4</b> | 183.48                      | 74.79                     | 105.84 ~ 144.66                                    |

## References

1. J. L. C. Rowsell and O. M. Yaghi, *J. Am. Chem. Soc.*, 2006, **128**, 1304–1315.
2. Y. Li and R. T. Yang, *Langmuir*, 2007, **23**, 12937–12944.
3. T. K. Prasad, D. H. Hong and M. P. Suh, *Chem.–Eur. J.*, 2010, **16**, 14043–14050.
4. H. J. Park and M. P. Suh, *Chem. Commun.*, 2010, **46**, 610–612.
5. M. Mofarahi and M. Seyyedi, *J. Chem. Eng. Data*, 2009, **54**, 916–921.
6. T. Masunaga, J. Izumi and N. Miura, *Chem. Eng. Sci.*, 2012, **84**, 108–112.
7. Y. He, X. Zhu, Q. Li and W. Yang, *AIChE J.*, 2009, **55**, 3125–3133.
8. Z. Xiang, X. Zhou, C. Zhou, S. Zhong, X. He, C. Qin and D. Cao, *J. Mater. Chem.*, 2012, **22**, 22663–22669.
9. A. Jayaraman and R. T. Yang, *Chem. Eng. Sci.*, 2005, **60**, 625–634.
10. A. Mallick, S. Saha, P. Pachfule, S. Roy and R. Banerjee, *J. Mater. Chem.*, 2010, **20**, 9073–9080.
11. E. D. Bloch, D. Britt, C. Lee, C. J. Doonan, F. J. Uribe Romo, H. Furukawa, J. R. Long and O. M. Yaghi, *J. Am. Chem. Soc.*, 2010, **132**, 14382–14384.
12. Y. J. Zhang, T. Liu, S. Kanegawa and O. Sato, *J. Am. Chem. Soc.*, 2010, **132**, 912–913.
13. Y. S. Bae, A. M. Spokoyny, O. K. Farha, R. Q. Snurr, J. T. Hupp and C. A. Mirkin, *Chem. Commun.*, 2010, **46**, 3478–3480.
14. K. C. Stylianou, J. E. Warren, S. Y. Chong, J. Rabone, J. Bacsá, D. Bradshaw and M. J. Rosseinsky, *Chem. Commun.*, 2011, **47**, 3389–3391.
15. A. O. Yazaydin, A. I. Benin, S. A. Faheem, P. Jakubczak, J. J. Low, R. R. Willis and R. Q. Snurr, *Chem. Mat.*, 2009, **21**, 1425–1430.
16. A. Phan, C. J. Doonan, F. J. Uribe Romo, C. B. Knobler, M. O’Keeffe and O. M. Yaghi, *Accounts Chem. Res.*, 2010, **43**, 58–67.
17. F. Debatin, A. Thomas, A. Kelling, N. Hedin, Z. Bacsik, I. Senkovska, S. Kaskel, M. Junginger, H. Mueller, U. Schilde, C. Jaeger, A. Friedrich and H. J. Holdt, *Angew. Chem.–Int. Edit.*, 2010, **49**, 1258–1262.
18. P. Pachfule, T. Panda, C. Dey and R. Banerjee, *CrystEngComm*, 2010, **12**, 2381–2389.
